# Supplementary material
Source: publisher figshare collection journal article supplement (https://gsapubs.figshare.com/articles/dataset/_/22280647)
Supplement: Supplementary file 1 [file 1]

## Sheet: Table 2. U-Pb data unknowns
Supplementary Table 2. U-Pb isotope data
						Isotope Ratios					Apparent Ages										Trace Elements
			U	U/Th		238U	2 sigma	207Pb	2 sigma	207Pb/206Pb vs	207/235	1 sigma	206/238	1 sigma	207/206	1 sigma		Best age	1 sigma		Al27_ppm_mean	Al27_ppm_2SE(int)	P31_ppm_mean	P31_ppm_2SE(int)	Ti49_ppm_mean	Ti49_ppm_2SE(int)	Zr91_ppm_mean	Zr91_ppm_2SE(int)	La139_ppm_mean	La139_ppm_2SE(int)	Ce140_ppm_mean	Ce140_ppm_2SE(int)	Nd142_ppm_mean	Nd142_ppm_2SE(int)	Sm152_ppm_mean	Sm152_ppm_2SE(int)	Eu153_ppm_mean	Eu153_ppm_2SE(int)	Gd157_ppm_mean	Gd157_ppm_2SE(int)	Dy164_ppm_mean	Dy164_ppm_2SE(int)	Yb174_ppm_mean	Yb174_ppm_2SE(int)	Th232_ppm_mean	Th232_ppm_2SE(int)	U238_ppm_mean	U238_ppm_2SE(int)
Analysis	Position (x)	Position (y)	(ppm)			206Pb	abs	206Pb	abs	238U/206Pb	age	abs err	age	abs err	age	abs err		age†	abs err
										error corr	Ma	Ma	Ma	Ma	Ma	Ma		Ma	Ma
19MP23
EBSD map1-11	37788	3766	61.6002	3.05851		22.2116	1.79603	0.484378	0.0280357	-0.541824	1409.1	46.6	283.9	11.3	4193.8	42.7		127.66	5.12		20593.4	1095.13	205.814	13.9356	165676	5163.16	69.9018	3.80685	112.458	5.41257	500.364	34.1406	360.218	15.9319	102.357	5.48885	42.5416	2.73591	93.5546	5.31022	107.201	5.30594	55.9162	3.04785	15.8356	0.941643	47.5364	5.26588
EBSD map1-12	37872	3687	77.2961	2.9678		30.3608	2.48202	0.406405	0.0360206	-0.86216	1061.6	54.1	208.91	8.4	3932.3	66.5		114.38	4.63		18259.4	1287.09	269.364	22.5066	167154	6099.02	97.0578	8.37911	136.834	5.15653	592.592	59.3451	406.584	46.8044	100.782	7.03878	47.6053	2.85419	91.4918	6.87408	104.576	8.52207	54.8167	4.03921	19.2834	1.10968	57.6628	6.11428
EBSD map1-13	37739	4709	49.7645	0.47654		22.1928	1.05894	0.509509	0.0202515	0.0280813	1448.5	23.6	284.15	6.64	4268.3	29.3		118.62	2.81		20270.9	846.999	207.386	11.7979	175357	6831.8	200.553	13.3203	481.04	23.5046	2944.78	136.693	3629.01	152.606	2092.56	102.065	91.1342	4.59864	1639.79	87.5723	3186.84	146.736	1316.28	74.4942	91.4725	4.30966	44.1959	4.07623
EBSD map1-14	37780	4646	46.6519	0.527304		17.6047	0.502915	0.553863	0.0199998	0.133506	1700.5	17.7	356.25	4.92	4390.8	26.4		128.94	1.81		32377.9	4887.62	196.826	11.1688	171596	7581.64	191.518	13.0765	459.987	21.1871	2698.17	162.377	3210.03	126.136	2011.54	131.106	85.115	4.67339	1620.08	87.0689	3376.8	157.454	1435.52	74.6305	87.8534	4.58479	46.8427	2.81057
EBSD map1-15	37801	4558	48.524	0.748608		13.9359	1.17087	0.658162	0.0234641	-0.730107	2046.9	49.6	446.6	18.1	4641.4	25.8		102.03	4.25		20356	1041.04	130.436	5.23172	163250	5830.54	114.677	6.56939	278.208	10.6487	1412.6	65.9886	1665.84	73.5953	914.296	36.2254	59.0983	2.21167	751.95	35.7143	1521.72	60.301	607.254	30.0525	51.7324	2.15126	39.3455	1.89679
EBSD map1-16	37752	4543	40.7376	0.452924		20.0002	1.97722	0.564745	0.0236091	-0.729566	1611.9	53.6	314.5	15.2	4419	30.5		109.18	5.36		19171.6	996.326	191.154	10.7923	170007	4049.7	158.635	9.8783	439.46	19.7852	2199.83	125.705	2153.4	195.224	1067.8	138.169	90.3223	3.96571	867.889	113.65	1628.44	221.214	731.615	92.5741	70.4778	1.63732	32.6327	1.74397
EBSD map1-17	37684	4601	47.2263	0.402694		23.4994	2.83627	0.495869	0.0473029	-0.821658	1384.1	78	268.6	15.9	4228.4	70.3		116.73	6.99		19537	979.643	204.819	12.5333	172028	5824.03	199.2	9.5883	473.768	25.0553	2801.24	162.12	3149.87	167.547	1777.94	105.79	82.2841	4.06891	1473.06	69.7994	2992.24	154.886	1215.33	58.5556	93.8151	4.10709	39.0246	6.15947
EBSD map1-18	37838	4518	58.6505	1.01195		29.0866	2.84388	0.425696	0.0288215	-0.806955	1121.2	53.5	217.9	10.5	4001.8	50.6		113.97	5.51		19282.2	1629.85	140.258	6.71564	171800	6910.58	97.6294	7.15469	294.238	13.6721	1471.19	95.4185	1653.72	102.938	905.673	67.0098	69.9387	5.16832	707.835	41.1442	1388.1	71.9423	522.318	28.2969	43.9148	2.67194	45.6163	2.55275
EBSD map1-19	37956	4676	80.5323	1.68311		19.766	4.91276	0.579243	0.0749428	-0.818439	1642	147	318.1	38.5	4456	94.2		104.5	12.9		21038.7	3991.42	122.579	13.9243	161659	13516	81.5202	6.80637	247.453	21.0787	1285.54	91.9716	1306.53	115.585	614.895	82.9815	72.5231	11.7735	474.375	39.9605	821.915	50.4845	323.054	19.2414	35.3773	2.51421	61.2286	3.17411
EBSD map1-20	37949	4628	69.1841	0.747406		14.4552	2.78181	0.620947	0.0537729	-0.937699	1964	120	431.1	40.1	4557	62.8		119.3	11.4		21284.7	1743.1	194.147	15.5025	162635	7241.32	144.723	10.0006	394.912	18.3732	2153.72	257.33	2284.06	232.257	1192.64	138.119	81.0811	3.88657	958.559	113.294	1810.03	217.237	712.802	97.968	67.7705	4.96756	52.3614	4.19912
EBSD map1-21	37901	4561	124.317	1.61665		34.8848	2.04013	0.358758	0.0284435	0.043205	896.4	28.7	182.22	5.25	3744.1	60.1		110.7	3.21		15157.9	2387.1	133.796	15.6983	167696	6646.92	89.433	8.24156	295.533	40.9913	1478.31	147.151	1478.42	152.788	633.727	87.9208	68.5143	8.81212	490.236	64.703	783.236	93.4733	325.56	35.5583	47.6776	5.07837	79.0687	7.01374
EBSD map1-22	37905	4515	29.6135	1.16562		15.6719	0.612011	0.605884	0.0340733	0.35222	1873.5	24	398.79	7.53	4521.6	40.9		117.88	2.27		25339.5	1633.58	135.879	7.0347	172281	6436.85	59.4358	2.59108	128.345	5.89042	625.142	41.5114	623.952	43.713	302.123	19.4604	34.6255	3.59032	237.44	17.7953	391.04	22.1768	166.948	10.6621	21.0146	0.802437	25.1343	1.6082
EBSD map1-23	37707	4326	51.6713	1.21542		26.6445	1.9986	0.455253	0.0221389	-0.162902	1229.2	34.1	237.55	8.75	4101.9	36.1		115.39	4.29		19047.4	1152.22	129.919	8.75319	165514	7422.72	66.4026	7.64596	237.859	14.0873	1193.82	149.581	1163.12	110.913	482.395	40.2312	68.1344	4.35209	398.715	24.6388	631.523	40.9115	285.463	17.0928	31.842	2.3471	39.707	4.09412
EBSD map1-24	37713	4460	85.6045	1.3149		38.3413	1.62455	0.307665	0.0109853	0.151307	756.3	13.6	165.98	3.46	3508.7	27.6		111.56	2.34		17761.6	970.758	176.121	11.7137	180492	6795.14	121.593	10.2636	366.217	20.1216	1678.37	99.1388	1726.67	117.298	872.83	63.5881	83.7175	4.6199	734.533	66.8272	1306.7	134.942	491.061	38.951	54.671	4.4316	72.858	5.46568
EBSD map1-25	37636	4316	38.0093	0.649548		19.6443	1.01009	0.563651	0.0266006	-0.445961	1625.1	34	320.15	8.03	4416.5	34.4		111.59	2.84		18881.6	1088.88	196.273	12.1919	178557	6091.03	125.018	9.02064	287.69	33.3285	1438.19	198.936	1324.1	203.96	512.85	62.1135	56.9696	3.90352	438.958	48.8829	743.905	81.9728	372.046	37.9449	46.2993	6.06801	29.8634	2.01082
EBSD map1-26	37714	4376	61.9765	1.12833		19.9415	1.37304	0.569318	0.0378499	0.349074	1620.9	31.2	315.4	10.6	4430.9	48.4		107.64	3.67		17590.4	1380.07	150.035	10.5921	173315	7383.78	61.6007	4.55278	263.431	27.2983	1338.4	72.8629	1367.21	99.7247	618.146	49.6229	78.062	3.59445	487.507	44.0722	792.173	66.4162	365.794	25.499	39.5073	2.27668	44.8147	2.07043
EBSD map1-27	37481	4345	24.13	2.77819		20.364	0.780694	0.588587	0.0254944	0.558655	1631	15.6	309.09	5.78	4479.5	31.5		97.75	1.86		17315.3	630.76	160.66	6.64884	175176	5506.74	62.3498	2.67745	65.3827	3.44752	226.019	13.0732	172.74	8.1101	54.0335	2.52864	17.0057	0.74034	47.6465	2.00271	70.72	4.05554	37.5735	2.10087	7.11984	0.295249	19.7995	1.04561
EBSD map1-28	37439	4468	30.4203	0.483733		9.43316	0.475284	0.695621	0.0377199	-0.0856378	2450	35.9	649.7	15.7	4721	39		118.41	2.99		23661	1697.3	229.569	18.8394	172932	8662.82	141.756	14.9592	334.321	26.8385	1638.82	157.91	1512.23	138.92	591.273	79.5812	62.1564	7.09303	505.212	62.5989	829.818	103.705	438.963	55.1911	58.6641	6.54397	27.3831	1.84522
EBSD map1-29	37503	4525	19.1407	2.54085		17.9313	0.720471	0.623156	0.0246242	0.52838	1783.2	16.2	349.86	6.84	4562.4	28.6		95.27	1.9		16640.7	1134.02	135.211	10.2727	179269	10422.1	61.3876	4.30606	66.2702	4.99637	220.537	12.5568	183.167	12.3964	68.7482	4.29032	15.3448	1.06397	59.1933	3.22959	89.4352	7.01781	39.3818	1.90542	6.58684	0.365222	16.6338	1.02814
EBSD map1-30	37534	4427	20.8355	2.31089		16.2442	0.991585	0.613063	0.0191788	0.026957	1853.1	28.8	385.2	11.4	4538.7	22.7		110.17	3.33		16638.2	662.616	162.225	8.02535	180369	5302.21	59.1651	3.27591	69.32	2.86501	244.932	9.49726	198.814	9.81928	73.4319	6.48009	16.4289	0.648051	60.7355	5.21257	89.3559	6.62453	41.4345	2.24748	7.47443	0.226792	17.1299	1.21856
EBSD map1-31	37606	4386	25.4096	2.57476		19.6894	0.841404	0.584868	0.0192812	0.573291	1653.1	14.7	319.35	6.65	4470.3	24		102.58	2.17		16890.6	868.197	180.796	12.5303	175863	9533.98	77.3835	3.16236	68.5414	2.64846	218.185	10.7276	173.721	9.0379	54.7165	2.40112	16.3023	1.02407	48.5238	2.52703	66.4336	5.15621	36.1499	3.15248	7.67728	0.332483	20.5622	1.23072
EBSD map1-32	37308	3677	30.4899	1.80271		18.1874	0.914503	0.556908	0.0335984	-0.19532	1677.8	35.2	344.99	8.4	4398.7	44.1		123.45	3.06		26297.6	2039.63	117.84	5.71254	167787	6558.39	52.2742	4.58302	121.298	5.86373	668.334	40.9417	670.176	54.2963	316.642	22.2233	64.9414	3.96652	253.902	20.2838	413.243	32.5734	190.813	15.0382	15.197	0.820922	28.2538	2.2416
EBSD map1-33	37202	3690	52.6084	2.44715		21.4999	0.989792	0.522232	0.0240787	-0.174805	1492.2	27.6	293.07	6.6	4304.5	33.9		117.62	2.68		18427.1	785.012	147.405	8.29669	164816	4896.78	70.2073	3.25898	132.238	19.042	608.204	95.1414	508.956	86.5013	173.937	37.7793	38.9233	3.70654	151.282	29.1694	204.379	46.9535	101.168	19.8635	17.2062	2.53491	41.8714	3.39954
EBSD map1-34	37194	3827	50.0643	2.967		17.5355	1.58482	0.621112	0.0146366	-0.112169	1798.8	40.3	357.4	15.7	4557.5	17		98.35	4.4		19845	2381.27	131.097	19.5931	167777	11082.8	53.8772	6.83671	91.883	7.55579	523.805	37.7511	476.98	42.6175	195.861	32.8874	44.4956	5.3765	152.525	21.5188	235.101	28.5954	109.937	15.1851	12.5656	1.14582	38.4031	5.69057
EBSD map1-35	37246	3768	50.0955	3.46387		32.7839	1.22285	0.413921	0.0132121	0.294367	1023.5	13.3	193.72	3.55	3959.7	23.9		104.13	1.92		17868.7	791.8	137.076	4.85648	176957	6510.47	60.3582	4.23036	85.0696	4.07859	404.143	26.2603	302.177	13.9124	85.1277	4.86961	29.4732	1.22545	74.593	4.11724	82.5563	4.17604	43.3614	2.15644	11.2267	0.485397	39.8274	2.45679
EBSD map1-36	37124	3751	35.7058	0.375866		20.4949	0.701821	0.541616	0.0179547	0.144427	1558.9	17.6	307.18	5.12	4358	24.3		115.72	1.96		19634.5	1073.29	219.238	10.3382	174381	4551.18	186.409	12.9822	462.244	28.4769	2271.22	139.701	2005.22	110.181	811.851	51.5874	80.2537	4.3859	717.953	47.4494	1185.81	72.0517	608.644	34.6045	81.0411	5.11173	31.1931	2.49417
EBSD map1-37	36991	3682	41.8069	0.811885		11.6228	0.52166	0.659544	0.0220273	0.361296	2210.7	20.3	532.2	11.4	4644.3	24.1		121.37	2.69		19187.8	1053.87	184.075	14.0499	170890	6161.04	112.719	15.381	270.758	38.9667	1339.2	200.619	1221.15	185.872	485.974	79.6253	64.7447	4.57981	426.887	66.1784	637.075	91.9392	314.952	54.7999	44.0246	7.06645	34.2429	1.70617
EBSD map1-38	36954	3730	28.4583	1.33431		15.9347	1.35646	0.617987	0.0315015	-0.755549	1876.3	54.9	392.5	16.3	4550.2	36.9		109.81	4.65		16871.3	710.63	141.05	5.83466	163614	6113.24	66.0921	5.26617	118.151	9.55321	490.894	40.0863	439.38	47.3415	186.199	22.8982	31.4628	2.16319	160.329	15.5824	252.523	25.0574	119.837	9.29033	16.485	1.46485	22.1241	1.684
EBSD map1-39	37038	3766	58.1857	1.4584		22.3564	1.36608	0.537087	0.0135007	0.709545	1483.5	18.3	282.04	8.45	4345.7	18.4		107.73	3.27		18543.7	712.617	135.036	9.81552	171192	5989.5	76.4469	4.56273	218.737	20.2554	1065.23	63.7715	990.616	67.1964	407.468	35.2343	64.544	3.51414	330.953	29.0599	497.514	47.6903	235.597	22.0909	32.0074	2.46724	46.434	3.24131
EBSD map1-40	36999	3800	42.2731	0.30028		19.0253	0.727269	0.528805	0.0221339	-0.0138198	1599	23	330.15	6.17	4322.9	30.7		129.98	2.47		19692.5	1209.95	314.754	23.1448	172874	7691.44	211.752	17.0353	548.614	25.7956	2904.08	105.454	2896.52	147.239	1205.39	77.5955	91.0775	4.92468	1012.53	67.1829	1550.25	74.6719	730.281	33.8007	117.129	4.58721	35.4103	2.14358
EBSD map1-41	36943	3781	15.0308	1.72634		8.20582	0.751953	0.722631	0.0193683	-0.558367	2614.5	51	740.9	32	4775.7	19.2		109.27	4.95		19303.9	847.793	134.582	9.92051	165923	5213.02	56.1527	2.71459	62.4041	3.28428	217.75	16.2061	177.457	8.37875	60.1965	4.43781	19.8405	0.922646	53.1558	2.69039	80.3228	5.57858	47.4191	2.47316	6.98486	0.357534	12.1174	1.24995
EBSD map1-42	36985	3851	30.1282	1.33371		17.8949	1.40433	0.589227	0.0469645	-0.726773	1738.1	61.1	350.6	13.4	4480.9	58		110.89	4.3		20425.7	1234.12	107.12	8.51379	162492	6338.47	49.8218	3.05854	126.655	8.4606	715.04	51.751	768.124	44.4913	373.67	27.1436	66.6469	4.5226	304.329	26.419	488.607	49.2788	228.766	19.8145	18.3277	1.23997	24.3311	1.41421
EBSD map1-43	37048	3847	38.6985	0.549535		20.1429	1.69923	0.544553	0.0319847	-0.591907	1577.1	51.3	312.4	12.9	4366.1	43		116.51	4.87		19433.2	1154.75	220.673	15.4025	172801	7017.77	160.338	15.1926	384.636	46.0138	1944.39	295.275	1736.69	212.125	715.257	82.1893	74.6672	4.58711	601.769	68.611	995.774	123.524	479.388	57.0896	67.4165	9.82199	34.0746	2.41401
EBSD map1-44	37093	3874	33.2196	1.01426		16.8888	1.43377	0.624044	0.0450604	-0.369791	1834.7	55.2	370.8	15.3	4564.2	52.4		100.73	4.23		17906.9	934.417	167.466	13.0187	173364	5843	89.1777	14.2863	231.453	63.4163	1109.97	272.63	1004.1	240.062	410.284	101.477	67.1932	6.79054	335.212	67.2355	544.506	127.169	290.068	76.6387	31.018	9.19435	27.4076	3.08008
EBSD map1-44.5	37091	3916	24.2233	1.58877		13.0539	0.668199	0.617433	0.0248489	-0.0183932	2048.6	29	476	11.8	4548.8	29.1		134.25	3.41		22384.8	1217.1	130.135	20.2062	165963	8869.73	55.95	4.38904	99.3159	3.06435	414.131	27.5597	438.421	20.0947	197.18	8.41707	46.365	2.03858	172.789	8.30062	284.449	19.0403	138.73	8.56826	12.866	0.483545	20.6994	1.77252
EBSD map1-45	37223	3900	78.4007	2.71832		32.3711	1.95729	0.389289	0.0224687	-0.103897	992.4	27.8	196.13	5.85	3867.6	43.6		111.6	3.35		19705.5	785.896	268.251	16.2041	167154	7720.38	81.338	8.58782	138.944	5.65481	696.622	35.8946	555.964	31.1284	192.41	14.2253	53.2299	2.94378	168.2	9.70752	225.081	18.1712	115.835	9.71063	23.9003	1.11745	65.2504	3.71223
EBSD map1-46	37186	3943	75.2697	2.83912		31.8419	2.21347	0.356965	0.0153143	-0.540394	948.6	30.6	199.35	6.81	3736.5	32.6		121.66	4.18		19099.9	1051.72	241.626	12.2443	163551	6404.29	78.4207	5.79885	134.493	7.09578	593.528	35.7247	425.22	35.5547	114.616	10.5175	39.8782	2.4058	98.0372	6.43145	106.56	8.0284	58.058	3.00064	21.0213	1.34541	59.4206	5.47088
EBSD map1-47	37167	4016	48.0011	2.00391		22.0335	1.56551	0.532036	0.0344531	-0.532042	1487.7	46.5	286.17	9.97	4331.8	47.6		111.21	3.93		18400.7	1161.11	175.434	15.4653	172537	10003.5	76.6974	5.66131	162.76	15.9009	740.415	103.097	638.913	89.7964	245.217	33.3314	44.7716	4.69838	201.884	29.6092	280.29	36.3943	130.771	14.0892	20.3681	2.90291	41.1505	5.87912
EBSD map1-48	37155	4070	35.5864	3.16052		21.5609	0.843696	0.540757	0.021407	-0.0694433	1517.5	22.6	292.27	5.57	4355.8	29		110.31	2.13		16961.2	1274.49	120.977	8.23265	164208	6851.51	56.5694	4.30259	85.2797	5.84672	377.89	65.5601	283.472	55.1837	87.549	25.2736	31.4581	5.11336	78.0261	21.5419	106.584	38.3238	53.8644	17.3996	8.96567	0.894859	28.3916	2.14375
EBSD map1-49	37236	3989	59.9547	2.58662		20.8514	1.64218	0.537418	0.0463343	-0.768035	1538.9	61.4	302	11.6	4346.6	63.1		115.36	4.5		17346.6	1144.8	178.559	16.9032	163585	5000.77	79.3525	11.877	148.66	27.5196	616.312	117.855	510.894	104.002	180.644	39.1512	39.228	3.01791	150.471	32.1774	212.616	47.8604	100.898	19.7554	19.3802	3.54052	49.8709	9.61349
EBSD map1-50	37220	4071	377.593	7.45781		43.5248	2.04005	0.228547	0.010334	0.577478	552.79	8.99	146.45	3.39	3040.9	36.1		113.1	2.63		18359.8	683.567	334.679	25.9494	159596	6403.68	170.333	28.8219	254.691	23.1168	1266.77	65.8768	935.74	51.518	244.674	13.3227	22.2748	2.68971	216.19	12.7675	221.327	16.3162	138.816	10.2397	42.0208	2.87244	317.303	25.3291
EBSD map1-51	37123	4148	59.0326	2.50864		23.8884	1.84189	0.509945	0.0343089	-0.656635	1392.7	49.8	264.34	9.97	4269.4	49.5		110.09	4.2		18729.5	755.801	147.953	7.94997	156042	3928.98	65.7953	2.98938	134.556	13.6862	741.123	80.2431	654.684	62.8012	226.367	21.8503	51.3935	2.66206	189.373	18.5136	238.379	35.8432	112.62	16.7055	20.9286	3.02975	50.2668	2.26632
EBSD map1-52	37389	4081	26.3013	1.28945		15.8447	0.728377	0.645239	0.0232713	-0.458217	1918.2	30.3	394.64	8.82	4612.6	26.1		96.51	2.21		19457.7	1392.54	146.471	11.7034	162006	9654.87	61.4674	3.90611	146.078	9.28336	759.228	68.6576	821.934	61.698	399.023	25.364	75.4168	5.01325	320.332	20.0037	541.398	36.7561	244.998	13.3012	18.4656	1.19435	24.4119	1.903
EBSD map1-53	37332	4059	100.312	1.90011		34.8001	3.83198	0.34168	0.0703563	-0.814409	869	88.2	182.63	9.91	3670	157		114.93	6.27		17507	884.233	198.844	19.9325	166341	6728.96	123.562	11.0078	333.346	21.8361	1473.72	68.2866	1354.71	101.236	508.142	34.1756	57.8728	6.44872	409.246	30.7414	543.53	52.9055	256.774	31.1996	48.5084	3.17107	94.3235	9.97836
EBSD map1-54	37313	4117	177.168	3.08341		36.5023	2.17577	0.281858	0.0232306	-0.782874	736	35.1	174.24	5.13	3372.8	64.2		122.87	3.63		16782.7	547.513	242.075	22.491	174247	7372.25	116.27	6.75196	305.355	12.5455	1481.01	97.4727	1282.47	43.6795	438.899	43.4543	46.2743	5.19255	355.95	34.1663	417.834	50.1078	209.305	21.6976	46.3483	1.3894	145.2	25.8893
EBSD map1-55	37328	4184	103.061	1.71388		29.1786	2.55499	0.395566	0.0365063	-0.563225	1070	52.5	217.22	9.33	3891.8	69.4		121.97	5.28		18355.5	1709.59	211.135	12.7513	169270	6863.59	126.465	9.92914	318.727	23.4268	1541.51	103.192	1500.16	38.98	584.174	40.9499	57.3319	3.60685	446.627	25.6937	577.634	40.0759	258.911	20.7563	55.1366	2.35897	96.7885	5.13423
EBSD map1-56	37227	4194	136.848	1.96007		30.2874	2.4558	0.391479	0.0460174	-0.895005	1038.7	63	209.39	8.37	3876.1	88.5		118.63	4.77		18790.1	1024.7	247.446	39.7466	159449	3694.51	137.804	28.9468	290.847	37.4187	1500.04	210.416	1446.73	212.651	547.554	60.2172	45.4095	4.17079	415.606	49.2749	478.747	39.3424	202.899	24.6407	62.4754	12.5866	126.249	25.9777
EBSD map1-57	37303	4263	51.4124	1.43132		26.7867	2.74107	0.424606	0.0303583	-0.624491	1176.1	54.7	236.2	11.9	3997.9	53.5		124.03	6.28		18322.9	2108.12	146.082	8.41785	175213	12947.5	75.0005	5.9086	224.948	15.8753	1126.63	165.822	1005.03	104.465	407.978	35.3097	56.9435	3.29383	338.757	16.1446	486.927	27.2455	229.261	16.329	29.1225	2.29744	42.3815	4.90105
EBSD map1-58	37384	4248	47.2638	1.47668		24.149	2.36598	0.476558	0.0163984	-0.498652	1333.9	44.2	261.6	12.6	4169.7	25.5		120.08	5.84		17394.6	1340.63	191.834	18.3809	178380	10899.9	83.945	9.38591	194.394	30.7703	885.122	142.675	841.903	161.601	344.075	63.3605	48.646	6.11739	279.332	44.1649	428.14	68.2822	196.81	27.6794	25.8603	3.55407	38.4424	4.71754
EBSD map4-1	42637	10970	35.4381	0.741009		20.9632	1.7221	0.522091	0.0215139	-0.564681	1512	43.5	300.4	12	4304.2	30.2		120.67	4.91		17658.1	661.327	164.227	8.73103	164939	4607.91	124.504	13.1725	273.54	34.9526	1325.81	131.001	1271.17	148.843	483.341	58.1545	76.9398	6.31266	395.7	49.742	630.546	86.6229	343.969	51.2608	46.1777	5.7017	32.8868	2.14295
EBSD map4-10	42461	11183	69.7033	2.68337		39.8332	1.43307	0.297497	0.0158727	-0.269568	718.6	18.5	159.85	2.83	3456.6	41.4		109.48	1.95		17674.5	741.408	284.137	17.8846	180733	4751.94	90.635	4.38259	154.006	6.5245	871.409	49.3918	870.99	40.5774	332.585	19.3588	77.7134	3.18534	255.582	12.9975	276.854	13.1592	113.967	5.82877	28.5509	1.15743	76.7359	3.40069
EBSD map4-11	42421	11237	44.2348	1.60041		32.0936	1.00157	0.382696	0.012725	-0.0589282	987.1	14.8	197.82	3.04	3841.8	25.1		114.23	1.76		17411	805.517	176.254	7.10252	182336	4900.2	86.5388	3.66388	195.442	10.2212	1054.54	60.7669	1023.21	44.5238	384.402	16.2239	78.2319	2.88748	321.82	12.9076	469.179	21.6915	250.703	12.524	28.4119	1.26156	45.5792	2.10525
EBSD map4-12	42359	11262	34.1568	1.27857		28.8113	0.938965	0.425015	0.0169351	0.393909	1126.6	13.8	219.96	3.53	3999.3	29.7		115.27	1.86		17566.5	718.02	153.639	6.2324	182229	5168.98	95.8325	5.10357	221.788	10.4788	1065.83	48.8301	1047.01	38.8186	452.148	18.2131	90.7482	3.40221	373.047	15.2219	625.849	30.8002	325.583	12.5603	28.447	1.45367	36.2813	2.14507
EBSD map4-13	42312	11231	44.5523	2.172		27.4954	0.836421	0.465378	0.0121554	-0.18875	1222.2	15.6	230.25	3.45	4134.5	19.4		108.83	1.65		17979	752.564	161.937	8.68266	176972	4182.36	73.6131	2.70782	156.09	11.097	881.52	65.1575	853.616	36.2716	351.825	12.5024	78.2025	4.01768	272.484	11.601	383.289	26.4003	184.038	20.8085	20.1628	1.1413	43.3278	1.65691
EBSD map4-14	42393	11161	79.1073	2.88775		39.0156	1.79293	0.308209	0.0139622	-0.179865	747.8	18.6	163.13	3.69	3511.2	35.1		109.52	2.49		20801.4	964.636	275.72	9.73109	175261	3954.62	86.7512	4.27397	143.404	5.15494	806.797	30.173	831.389	26.1445	321.091	10.8753	76.1524	2.73886	238.079	8.34419	264.551	9.28078	116.621	4.44231	28.3001	1.2645	83.7337	3.79853
EBSD map4-15	42373	11047	48.8155	2.74033		32.9829	0.543093	0.39889	0.0287828	-0.513565	996	25.9	192.56	1.55	3904.3	54.3		107.19	0.87		17667.9	1156.89	208.496	17.7948	184949	10863.7	81.0445	5.50543	127.027	7.05154	709.786	57.6748	708.725	50.2254	251.747	18.7616	61.9782	3.77747	208.158	12.17	206.075	16.6399	88.6446	5.24849	19.934	1.16462	54.42	2.45059
EBSD map4-16	42381	11099	65.1032	3.24053		35.1374	1.16419	0.37759	0.0177212	0.0764102	922.6	16.7	180.89	2.94	3821.5	35.4		105.55	1.73		17743.8	586.756	174.293	14.9136	177563	5001.59	74.7962	3.79838	118.424	5.75611	674.054	33.8815	674.681	39.9045	248.157	14.4261	60.4065	3.55166	190.589	8.91193	201.393	7.20879	86.9179	3.94932	18.0672	1.33134	58.6235	5.70541
EBSD map4-17	42334	11129	71.0241	2.73888		34.7853	1.19054	0.359376	0.0115131	0.521891	898.93	9.69	182.68	3.08	3746.6	24.3		110.84	1.88		20701.4	756.77	260.715	13.6442	180115	4919.25	106.497	5.67162	139.614	4.94852	811.304	40.7825	851.897	49.2814	338.126	14.6582	81.7776	3.79627	256.935	13.7142	292.006	12.3127	124.625	7.7206	27.9639	1.01264	76.6002	4.10291
EBSD map4-18	42271	11175	32.282	1.04715		22.7257	1.35665	0.513414	0.0218458	-0.05378	1435.9	28.8	277.55	8.13	4279.5	31.2		114.43	3.39		17933	646.64	141.668	7.40047	183090	6111.69	112.773	4.18382	250.976	14.4511	1134.88	72.1809	1070.77	66.2962	424.101	30.085	88.9053	5.87811	373.237	23.0531	634.594	38.9616	337.19	21.8489	33.3246	2.15131	34.4479	1.21897
EBSD map4-19	42225	11139	30.3926	1.4547		12.7423	1.10315	0.663428	0.0264149	-0.230122	2133.6	45.9	487.1	20.3	4652.8	28.7		108.28	4.64		21580.5	1348.72	211.379	17.5471	174193	4130.19	98.7965	6.01339	149.222	13.837	788.225	49.6354	872.258	60.8933	415.336	26.5461	73.8366	4.7455	342.055	27.7475	514.995	41.7965	220.734	18.7128	22.4174	2.15235	31.921	2.27804
EBSD map4-2	42639	11045	52.6167	2.34592		26.3705	1.52647	0.440788	0.0232941	-0.108916	1213.4	29.3	239.94	6.83	4053.8	39.4		121.02	3.48		18929.9	802.906	170.561	11.9622	168468	4361.37	69.9808	3.36714	137.521	5.81417	796.838	45.624	887.408	42.9334	421.679	30.1539	81.8975	4.61207	321.944	21.9429	407.921	21.7865	163.982	11.8578	20.9548	1.2442	50.3374	3.89364
EBSD map4-20	42337	11184	51.2073	2.90801		29.0536	0.867301	0.435234	0.0199041	0.0271248	1137.2	18.4	218.17	3.21	4034.7	34.1		111.48	1.65		19198.1	669.111	173.908	5.85431	182301	6397.64	71.5645	3.34283	120.899	3.62815	670.825	27.0857	664.532	19.0111	250.175	6.37646	62.7841	2.12702	189.571	6.94543	198.723	7.99783	89.0356	3.40484	17.3219	0.527622	50.3194	1.97775
EBSD map4-3	42580	10946	41.0839	1.99979		23.889	3.40972	0.483923	0.0272525	-0.777313	1353.3	71	264.3	18.5	4192.2	41.7		118.9	8.41		19469.7	1174.95	146.255	8.99682	166516	4919.98	75.3341	3.34832	131.919	11.0193	769.771	70.119	775.117	58.2951	315.946	19.1468	69.6948	3.16198	249.864	12.1669	344.587	25.9614	154.763	10.7842	18.8371	2.36696	38.9837	5.40959
EBSD map4-4	42538	11018	39.2398	1.23813		28.0282	1.37964	0.41469	0.0156387	-0.48764	1128.6	25.6	225.98	5.47	3962.6	28.2		121.43	2.96		18053.9	846.76	165.939	13.6084	164579	5074.95	114.108	18.911	280.558	54.6284	1409.34	249.984	1303.11	214.75	476.801	75.6451	80.2224	7.62707	401.924	70.3956	637.712	133.122	346.447	80.7668	43.7404	10.5534	38.5065	1.97542
EBSD map4-5	42505	11068	42.8125	2.49857		16.0952	1.84476	0.561975	0.0294138	-0.765703	1786.8	66.5	388.5	21.5	4412	38.2		136.8	7.74		21661	1084.87	164.86	8.46162	179802	4744.97	62.7078	2.83543	106.807	5.44837	670.722	26.7045	784.171	35.2619	372.685	16.0675	77.3201	3.1419	274.73	14.0042	374.889	28.3998	145.694	12.4203	16.5317	0.71772	41.6331	2.32305
EBSD map4-6	42478	11006	52.7777	2.16981		32.3936	0.90167	0.384962	0.0231722	0.245294	985	18.8	196.01	2.68	3850.8	45.5		112.6	1.55		17417.6	665.837	184.604	10.1442	181177	5089.27	72.1072	3.23925	138.033	4.76683	763.503	36.3331	743.998	29.4637	249.537	12.3452	69.6564	3.27518	194.058	9.58573	199.662	7.365	84.2849	3.88523	22.7385	1.11669	50.7856	1.76385
EBSD map4-7	42431	11044	69.4538	3.07098		36.1314	1.08213	0.320932	0.0127583	0.629014	811.64	8.76	176	2.59	3573.5	30.7		115.38	1.71		16649.8	731.402	234.753	12.2877	181499	7207.2	71.1532	4.50201	119.818	5.32161	727.972	41.2665	743.155	37.9624	286.53	14.603	63.0296	3.02351	228.031	13.5325	255.742	14.5895	92.8335	5.04301	20.3835	0.647356	63.0451	2.32624
EBSD map4-8	42432	11107	51.1444	3.17743		37.1816	1.97127	0.337192	0.0219002	0.481138	823.4	17.2	171.09	4.47	3649.4	49.7		108.59	2.85		18873.7	1181.19	157.447	10.4253	179714	5695.96	68.3518	4.41076	111.515	8.52153	619.333	27.3749	661.136	37.1657	264.064	16.7381	63.9312	4.20887	200.309	17.2321	222.854	13.6946	93.7684	6.19127	17.3796	1.34695	55.6149	4.44572
EBSD map4-9	42510	11149	60.5449	3.33016		31.1711	1.03674	0.416758	0.0133174	-0.251166	1060.9	17	203.57	3.34	3970.1	23.9		108.72	1.8		18550.4	671.905	173.455	8.69989	176239	5952.81	68.289	3.02081	114.459	3.80976	690	27.7142	701.938	26.2748	266.211	11.4128	64.326	2.45135	199.384	9.14688	222.388	9.69787	101.457	5.07189	17.2911	0.552677	57.7873	2.6366
EBSD map5-1	27085	28624	22.085	0.521983		19.9834	1.49771	0.517983	0.0498609	0.471356	1543.6	35.7	314.8	11.5	4292.6	70.8		128.21	4.77		19339.4	798.862	168.376	12.5006	191639	8063.16	130.226	20.6676	323.846	37.3611	1598.28	155.384	1573.87	154.357	798.579	79.9081	87.5475	3.69235	720.605	67.9763	1150.02	86.1159	533.223	52.5914	56.6214	6.80705	28.0435	1.88938
EBSD map5-1	37605	18120	37.8204	0.407265		19.4187	0.574893	0.553469	0.0150968	-0.229794	1619.5	18	323.68	4.63	4389.8	19.9		117.1	1.7		18410.2	920.712	242.492	15.8975	180315	7576.95	196.158	15.5221	461.985	35.9868	2281	173.939	2252.27	231.716	916.31	97.7142	83.1487	5.4259	790.794	91.9231	1342.95	148.54	681.327	72.7967	94.8182	10.4332	37.7625	2.18164
EBSD map5-10	26966	29791	29.3833	0.405133		27.5609	0.682526	0.491894	0.014438	0.292107	1260.3	11.7	229.76	2.78	4216.5	21.6		100.8	1.23		18421.3	704.595	225.331	13.4651	193015	5438.95	175.591	12.4601	411.503	28.1598	2243.18	107.889	2345.42	133.808	1133.7	56.8389	83.967	2.70712	1030.42	60.7891	1655.16	99.1509	640.59	42.802	77.048	5.56964	29.495	1.0643
EBSD map5-11	26961	29663	20.9576	1.04211		21.0801	0.523096	0.545991	0.0101863	0.675698	1542.81	7.21	298.78	3.6	4369.8	13.7		110.81	1.36		17847.6	741.999	135.756	7.18382	195030	7699.46	74.7592	3.46854	139.304	7.32447	895.414	56.8658	1153.58	81.5494	693.204	51.0657	75.9339	3.10387	610.302	51.5911	979.899	71.4047	352.98	22.1675	20.7178	1.21171	20.5099	0.657044
EBSD map5-12	26996	29479	38.3258	0.481512		15.1308	0.828789	0.640486	0.0140619	0.104072	1951.5	24.7	412.6	11	4602	15.9		103.54	2.82		20659.2	1254.87	236.763	22.6005	191042	8416.28	152.705	21.5378	391.174	63.4849	2405.45	285.832	2613.37	320.822	1333.05	140.97	85.4271	3.62334	1100.65	86.9849	1816.75	139.256	681.31	45.7119	76.6146	12.3432	33.5481	2.40138
EBSD map5-13	26975	29378	22.4541	0.629667		20.2881	0.534408	0.573637	0.0154691	0.133105	1612.9	14.2	310.13	3.95	4441.9	19.7		104.08	1.35		19564.6	681.342	185.105	12.5779	189425	5399.21	124.738	21.4232	293.157	59.6102	1651.98	364.665	1723.68	371.991	849.325	177.69	74.3235	4.66942	735.264	150.696	1152.02	230.951	420.087	72.9711	47.5285	10.3027	22.1945	0.76081
EBSD map5-2	37600	18058	22.0363	0.9014		21.7619	0.631493	0.527597	0.0189145	0.243096	1490.8	15.7	289.65	4.1	4319.6	26.3		114.22	1.64		17335.8	515.923	133.323	3.29537	183712	5323.13	75.3532	3.07417	145.551	7.81521	845.625	47.828	936.368	36.9379	459.082	18.8837	64.8249	2.43896	389.615	15.6731	604.567	20.7363	251.167	10.2615	23.3897	1.41556	21.1217	0.721
EBSD map5-2	27131	28747	38.6895	0.451961		31.0943	0.664556	0.429554	0.020781	-0.326162	1082.6	19.6	204.08	2.13	4015.4	36.2		105.66	1.11		17386.3	709.423	225.052	11.5393	185728	6650.84	180.322	8.3749	436.905	16.2171	2123.26	137.331	1856.91	83.1186	784.659	32.8867	78.0439	3.39225	688.016	38.7571	1123.03	49.0455	578.376	26.6723	78.7362	3.59462	34.2648	1.99258
EBSD map5-3	37518	18121	28.7885	0.452574		18.2878	1.54428	0.557554	0.052082	0.0413564	1674.3	50.5	343.2	14.1	4400.6	68.3		122.47	5.11		23238.8	1715.12	177.044	10.4565	182338	10248.4	134.011	14.3048	328.085	18.9192	1936.36	251.754	2063.08	189.592	1081.85	113.918	71.5595	4.92887	959.918	77.0189	1677.65	130.623	733.347	53.8523	62.21	3.89046	28.5335	2.64051
EBSD map5-3	27079	28786	37.5976	0.385437		29.2717	0.89321	0.462889	0.0185549	0.441813	1174.5	13.3	216.56	3.24	4126.5	29.8		102.98	1.55		19809.9	737.612	254.891	9.46777	198384	5883.54	209.872	10.1702	492.436	26.7825	2753.19	183.948	2972.98	152.874	1394.71	59.4279	96.6609	3.72937	1251.3	46.6064	2011	61.0565	889.666	35.5292	102.926	4.78655	38.0337	1.99368
EBSD map5-4	37518	18060	17.5847	0.838565		18.7347	1.01733	0.577999	0.0180218	0.152372	1684.3	24.1	335.3	8.9	4453	22.7		110.79	2.99		21833.6	966.581	112.466	6.05165	183088	6701.69	57.183	4.51205	163.149	21.2467	841.372	78.5374	981.781	72.9937	524.292	25.1753	76.6306	4.42204	443.678	23.6399	762.428	50.9226	332.522	29.7565	25.5207	3.23865	20.5917	1.01683
EBSD map5-4	27077	28669	34.4202	0.947364		21.8765	1.65495	0.564387	0.0278118	0.251388	1539.6	31.3	288.1	10.6	4418.3	36		99.96	3.74		18254.8	869.19	139.269	7.90286	187420	6160.08	74.2867	2.65092	214.471	16.3261	1134.4	69.5213	1069.31	37.6111	491.223	27.2783	75.949	2.03483	406.859	18.7297	676.537	34.6278	309.339	18.5817	30.4274	1.91197	27.5296	1.64924
EBSD map5-5	27146	28703	20.1001	0.797805		20.4303	0.904334	0.548351	0.0273133	-0.741776	1571.2	35	308.06	6.63	4376.2	36.4		113.36	2.48		20619.6	1124.22	156.011	8.73424	199672	10164.8	60.5474	4.85312	234.319	10.5734	1096.35	41.9921	1153.79	36.449	607.264	21.6288	97.1239	4.16529	536.708	29.7766	895.166	45.0369	386.411	20.5404	31.2257	1.44779	23.9176	1.03784
EBSD map5-5	27001	29261	33.435	0.70578		26.8107	0.651271	0.490031	0.0295014	0.615922	1277.5	17.8	236.07	2.81	4210.7	44.4		104.18	1.25		17676.6	832.211	162.914	7.43951	187401	4499.47	104.377	8.15034	342.333	18.0514	1518.08	77.4385	1411.72	54.313	643.81	15.7191	83.2269	2.89929	587.38	22.3965	972.448	37.2551	422.261	16.972	43.0044	1.72496	29.6565	1.02611
EBSD map5-6	27076	28715	31.2438	0.4251		30.5603	1.25194	0.439129	0.0166888	0.195908	1108.8	16.9	207.57	4.18	4048	28.3		104.97	2.13		19054.2	842.192	259.92	24.3381	200110	6358.5	198.822	23.2774	457.152	58.8278	2206.07	226.344	2173.82	242.648	937.032	89.3238	86.1518	3.03765	848.066	90.8086	1325.35	136.496	656.136	85.8534	92.9332	12.3414	35.4778	2.30465
EBSD map5-6	27135	29374	33.4392	0.323869		18.325	1.74924	0.569223	0.0327715	-0.155658	1689.5	49	342.4	15.9	4430.6	42		117.08	5.54		20017.5	2223.2	278.011	31.9421	194158	10545.2	228.657	21.2832	562.072	45.9229	3009.31	223.238	3462.32	359.622	1816.4	149.954	87.9271	6.70528	1621.65	144.15	3022.97	250.097	925.36	63.7591	96.3215	10.2416	30.35	2.98974
EBSD map5-7	26987	29425	25.9036	0.281741		17.0136	0.381901	0.610414	0.0289932	0.0787336	1810.1	21.5	368.26	4	4532.3	34.5		106.5	1.18		20708.5	909.851	308.744	13.6035	192559	6663.41	241.078	9.9951	574.271	29.5467	3084.75	185.736	3264.98	177.422	1615.43	81.7184	93.3732	4.31884	1433.11	87.0925	2415.87	157.206	840.718	63.6718	103.753	4.16612	28.5187	1.38693
EBSD map5-8	26984	29620	25.6828	1.01006		22.8784	1.00069	0.548497	0.0249352	0.706128	1482	13.2	275.77	5.9	4376.5	33.2		101.25	2.2		17712.5	557.347	121.456	5.05172	183241	6108.37	68.7399	3.89296	149.381	6.52607	856.122	41.4199	1031.67	36.9438	598.317	27.3171	72.052	1.92348	516.634	20.5622	842.241	33.7016	328.35	12.4472	21.5773	0.769458	21.1804	0.732913
EBSD map5-9	26993	29758	21.3524	0.989161		23.5427	0.948259	0.52592	0.0247401	0.564714	1427.5	15.9	268.19	5.3	4314.8	34.5		106.21	2.13		18103.9	980.965	163.746	10.6973	190430	7459.89	75.0707	4.30151	151.527	9.05282	905.569	63.6034	1073.16	62.7412	653.406	29.8252	69.2861	2.98253	560.77	34.9904	937.137	58.9345	360.418	23.4509	23.143	1.45552	22.2325	1.38197
EBSD map7-1	43299	3126	59.5748	0.571919		32.06	0.925322	0.377349	0.016714	0.382715	978.7	13.4	198	2.83	3820.3	33.5		115.7	1.66		18642.9	1681.05	263.657	21.4904	178634	10555.6	198.682	18.7529	488.958	39.9874	3084.45	193.197	3834.91	331.136	2207.94	223.335	97.6138	6.77064	1935.01	190.911	3321.99	427.85	1213.28	186.592	96.2392	8.24949	54.1786	2.33643
EBSD map7-2	43261	3079	48.1093	0.521623		26.906	3.43774	0.451404	0.015872	-0.0616995	1215.9	47.7	235.2	14.8	4089.2	26.2		115.42	7.31		17702.2	1470.12	230.658	15.1354	174927	10857.1	158.625	15.4347	417.11	47.7905	2594	330.59	2694.25	386.268	1344.88	145.436	92.5195	8.51157	1171.27	143.592	2080.68	188.932	904.645	133.465	77.5643	11.0974	40.66	7.54363
EBSD map7-4	43228	3128	2.68626	1.5367		1.84645	1.8795	0.790301	0.0436496	-0.802125	4155	530	2786	1149	4903.7	39.3		186	93.2		3.13453e+06	1.49398e+06	427.786	182.171	63968.9	30837.4	264.746	114.071	84.4471	58.52	514.672	353.393	440.752	295.059	313.238	208.353	30.5534	15.2028	451.529	162.517	442.829	307.487	127.411	97.0582	8.56199	5.55532	8.16488	3.20219
EBSD map7-5	43197	3173	9.60851	0.79714		5.31777	3.51897	0.760162	0.0585818	-0.853385	3076	352	1110	337	4848.3	55.1		111	36.4		1.07896e+06	712337	543.958	221.163	88554.3	38493.6	307.557	116.119	168.695	80.9062	990.557	490.349	1081.55	540.081	587.596	288.221	46.828	18.1011	496.236	225.254	809.19	415.565	369.596	180.191	25.2237	14.0881	13.5837	6.52113
EBSD map7-6	43113	3220	30.9475	0.421191		8.3854	0.343689	0.698342	0.0240355	-0.632005	2562.2	31.6	725.9	13.9	4726.6	24.7		130.38	2.62		33848.3	6294.33	258.894	24.4554	188200	10304.9	163.151	10.9006	410.384	24.4796	2568.34	368.877	2875.17	474.181	1706.35	224.067	95.5508	7.6183	1492.8	133.831	3055.58	406.377	998.447	121.086	76.1866	6.59848	32.553	4.55163
EBSD map7-7	43196	3346	48.3512	0.456119		15.3063	1.1702	0.626912	0.0388166	-0.0325283	1922.7	43	407.9	15.1	4571	44.8		109.53	4.15		19086.2	1860.11	293.122	9.22068	191642	13011.2	212.045	24.6628	547.179	47.378	3634	391.604	3918.72	303.742	2194.68	263.968	98.6447	8.3083	1926.81	105.152	3432.22	240.041	1246.59	89.6558	96.7239	6.04445	44.6473	3.83648
EBSD map7-8	43141	3321	34.6741	0.391532		5.93333	0.612214	0.72921	0.0397524	0.718039	2931.9	35.5	1004.6	47.8	4788.7	39.1		141.97	7.22		19935.9	1162.92	268.961	19.8467	212693	25837.6	187.693	7.21065	470.799	18.5244	2603.58	91.7404	2837.14	102.925	1347.09	96.9039	97.9115	4.81783	1153.15	68.1138	1960.36	72.3945	862.719	37.774	92.7732	5.726	36.5787	1.95182
19MP19
EBSD map1-10	27209	60677	3.54553	0.479248		2.99764	0.496982	0.80056	0.0381543	-0.204231	3687.6	90.1	1855	134	4922.2	34		93.49	7.73		27303.6	8521.85	215.961	21.4267	187446	7074.25	118.394	7.70428	25.0454	1.77913	156.865	10.2492	175.318	11.3202	68.1756	3.3498	39.8523	2.55558	55.9406	2.9676	97.166	5.64304	99.2511	7.58672	6.53833	0.337325	2.93101	0.222013
EBSD map1-11	27419	60791	6.82788	5.99481		6.54236	0.7929	0.739295	0.0348987	0.367613	2851.4	53.6	917.2	51.6	4808.4	33.8		118.93	7.12		17153.1	1282.36	189.784	9.71806	196491	6527.43	93.6771	5.072	44.4073	3.39292	303.98	25.6851	328.549	27.6214	113.89	9.49903	112.16	6.46024	88.3989	7.45423	136.635	11.27	175.768	13.7739	0.964828	0.10066	5.13895	0.596026
EBSD map1-12	27753	60860	3.6012	2.37683		4.39879	0.353684	0.743966	0.0258415	-0.323217	3239.7	46.9	1320.2	47.5	4817.5	24.8		167.68	6.58		14789.8	746.57	243.953	15.5337	184606	5545.1	216.716	9.04929	25.7718	1.68413	131.161	8.55457	109.858	6.37995	29.7435	2.13363	26.8846	1.42665	24.8756	1.51728	34.261	2.10353	47.2509	2.67221	1.19832	0.0721335	2.75875	0.269699
EBSD map1-13	27676	60783	2.08906	1.40346		1.59778	0.217714	0.863741	0.0720914	-0.924584	4389	109	3130	170	5030	59.2		n.d.	n.d.		51211.1	5833.96	272.076	28.7121	161076	15594.1	161.118	19.436	27.3047	3.96161	154.27	31.0869	122.442	21.5811	31.5881	5.39437	21.0808	3.70452	26.2973	3.57905	35.8486	5.51676	44.9006	5.17959	1.60544	0.18137	2.08846	0.304737
EBSD map1-14	27638	60726	4.28863	1.74015		2.88015	0.693509	0.82888	0.0745189	-0.625316	3762	151	1921	199	4971.6	63.9		17.57	2.1		25991.5	10802.5	308.427	44.5082	168697	16276.7	177.706	10.9291	30.1325	5.0262	168.858	24.8998	139.816	20.936	34.3537	2.02365	22.5239	2.3103	29.5017	2.1859	40.3135	3.29794	49.0849	4.80142	1.8258	0.149668	2.90934	0.51609
EBSD map1-15	27676	60638	3.15498	1.24471		2.86778	0.177241	0.80066	0.0437416	0.133658	3731.6	38.4	1927.1	52.2	4922.3	38.9		97.42	3.03		14766.6	605.982	272.892	22.8854	179667	4924.98	599.672	132.957	25.51	1.92848	141.363	6.96496	125.708	5.73654	37.2623	1.96075	21.7935	1.06833	32.3634	1.44934	47.8443	2.91189	54.5809	2.98247	2.00633	0.485846	1.88448	0.132375
EBSD map1-16	27797	60684	2.36974	3.12549		1.83163	0.245473	0.796362	0.0399176	-0.394532	4173.7	81.3	2810	156	4914.7	35.7		171.2	11.5		21094.6	4353.53	144.745	10.1778	178903	8450.19	106.046	12.8208	19.6586	1.52501	114.746	7.19738	95.4294	7.58959	23.715	1.56116	17.1835	1.42644	21.1394	1.93698	26.8698	2.00814	35.0203	1.47651	0.510377	0.0775	1.4222	0.0817634
EBSD map1-17	27809	60636	1.88941	1.82214		2.19083	0.0944898	0.825654	0.0274301	0.374149	4030.6	21	2424.6	41.5	4966.1	23.6		35	0.72		14689.4	766.893	162.072	9.17028	183533	7945.34	104.108	5.07264	23.9136	0.93202	125.358	5.44657	105.894	4.6572	26.1208	1.28413	19.0238	0.756185	22.7986	1.19131	29.4976	1.54085	35.2876	1.6242	0.723368	0.0389008	1.194	0.0580214
EBSD map1-18	27825	60744	2.49763	1.86278		2.75453	0.135516	0.824876	0.0332167	0.538973	3803.4	22.2	1999.4	43.8	4964.7	28.6		30.25	0.77		14206.1	807.668	165.613	7.92579	179958	4775.3	103.276	4.03231	25.0555	0.993999	132.141	5.63505	116.136	4.6278	31.7288	1.40925	21.7963	1.21465	27.2792	1.54965	40.0027	2.901	43.815	3.3462	0.961406	0.0822939	1.60518	0.0829913
EBSD map1-19	27760	60751	1.93784	2.03989		3.30594	0.126682	0.792178	0.0227042	0.365589	3580.2	19.3	1701.8	29.4	4907.1	20.4		105.3	2.05		14861.9	687.623	154.196	8.99459	198344	6275.65	120.683	5.64376	24.1284	1.0463	120.861	5.31653	101.875	4.7345	25.314	1.26715	22.6341	0.94251	21.6429	1.47766	27.768	1.60887	38.551	2.24672	0.931723	0.0380942	1.88058	0.0822347
EBSD map1-20	27715	60371	3.27728	1.79276		3.55051	0.143615	0.781292	0.0217972	0.134046	3497.6	22.2	1599.9	27.9	4887.4	19.9		123.02	2.4		15896.3	671.895	427.223	16.6415	187345	5907.64	409.497	24.0222	41.9954	1.7588	204.775	12.4756	180.365	7.91111	45.9034	2.80412	29.8446	1.6769	40.0888	2.00557	50.4992	3.2392	58.573	2.97169	1.89307	0.138089	3.30433	0.230265
EBSD map1-21	27677	60324	2.12984	1.48962		2.2897	0.219798	0.783123	0.0298542	0.159862	3933.5	48.5	2335.8	94.1	4890.7	27.2		183.75	8.7		16589.8	762.737	324.183	30.304	187738	3413.11	324.498	58.531	30.4021	2.46563	149.033	8.51094	129.463	8.38135	33.5657	2.01334	21.7335	1.20711	28.6341	1.59623	36.8887	2.23794	43.2506	3.10866	1.52999	0.289624	2.05675	0.151885
EBSD map1-22	27746	60414	3.4093	1.34865		2.72888	0.286058	0.800373	0.0363776	-0.442231	3780.7	65.7	2012	91.8	4921.8	32.4		103.28	5.44		26577.1	3181.42	297.688	18.4996	188710	6974.75	219.948	9.6578	32.8486	1.88172	184.316	11.0476	157.716	8.37899	46.1077	2.92874	29.0742	1.4791	38.1054	2.1156	54.4779	2.65439	59.0276	2.3053	2.48365	0.179635	3.2969	0.334975
EBSD map1-23	27207	61150	2.58161	0.533238		3.11437	0.442037	0.798338	0.0325007	0.233792	3649.2	68.1	1797	111	4918.1	29		96.19	6.75		19764.5	2867.83	172.947	7.16044	198575	6027.86	97.8723	4.03057	21.8317	1.02075	142.294	6.6783	176.875	9.28908	69.6746	2.47968	37.8895	1.39955	57.3881	2.89345	102.999	4.83945	100.809	3.36795	5.13836	0.652473	2.56889	0.230689
EBSD map1-24	27252	61010	2.93148	1.17212		2.80299	0.398414	0.77664	0.0645273	-1	n.d.	n.d.	n.d.	n.d.	n.d.	n.d.		n.d.	n.d.		19399.8	8769.58	192.602	39.2272	194029	19054.9	120.536	15.3717	17.9617	0.190231	134.069	11.0869	151.72	5.89389	62.2339	4.31928	29.2693	0.401599	44.6744	5.36273	87.1348	8.19718	85.698	4.881	2.21632	0.210984	2.52907	0.178807
EBSD map1-25	27321	61165	2.3732	1.31311		2.53699	0.456444	0.779922	0.0844651	0.466167	3826.5	80.1	2140	165	4884.8	77.3		175.9	15.7		18167.7	1856.53	204.605	15.324	185602	12210.1	113.439	7.31827	18.0866	1.30032	126.387	11.7727	147.748	12.3923	68.7148	6.70288	32.0322	2.69608	58.1894	4.33111	115.752	8.80602	114.663	6.97424	1.58695	0.104005	2.01424	0.245941
EBSD map1-26	27291	61072	2.30151	0.748929		3.56133	0.123131	0.768358	0.0297292	0.463564	3478.5	18.6	1595.9	23.8	4863.6	27.6		151.86	2.53		12972.7	913.503	163.173	7.88961	194174	6798.6	102.491	7.50984	22.5691	1.60106	142.444	8.45228	161.939	9.16737	65.6145	2.93057	33.9346	1.68914	52.5419	2.9447	93.2032	5.07825	92.5033	4.95397	2.9755	0.339884	2.10262	0.119984
EBSD map1-27	27245	61080	2.34946	0.793706		3.82119	0.144867	0.78933	0.0350236	0.626729	3435.6	17.4	1498.9	24.5	4901.9	31.6		97.45	1.77		12577.5	367.174	162.595	7.56083	191851	5785.17	110.759	6.46689	21.5667	1.05578	134.359	6.79233	161.201	7.69227	66.5663	3.65588	35.7711	1.39692	52.9506	2.97175	94.3877	5.9249	95.0936	5.022	2.58232	0.238454	2.04343	0.0938458
EBSD map1-28	27261	61129	2.66883	0.542501		3.81867	0.161836	0.783441	0.0261722	0.618528	3428.3	16.5	1498.9	28	4891.2	23.8		109.94	2.28		13099.9	480.779	196.603	7.30049	195028	6961.61	109.099	4.41453	22.1522	0.679748	147.318	6.8219	183.322	7.15446	78.6873	3.53136	39.8183	1.44304	64.9488	2.90442	112.28	6.242	103.793	5.24394	4.7542	0.632121	2.39982	0.126226
EBSD map1-29	27244	61191	2.51718	0.602678		3.28872	0.336415	0.768032	0.0293643	-0.222642	3555.6	58	1710.9	77.6	4862.9	27.3		165.2	8.43		19307.7	3234.25	184.217	8.85903	190105	5764.57	106.487	5.89446	21.3125	1.12045	146.031	6.31926	186.484	8.14819	80.4333	3.45437	42.4493	1.94241	64.6118	3.28732	119.582	7.21823	115.76	7.46589	4.63158	0.724848	2.56256	0.163098
EBSD map1-30	27728	60816	0.11141	1.82374		0.129892	0.0180358	0.810556	0.0239474	-0.0856393	6861.3	80.7	13940	439	4939.8	21		1456	100		160930	9261.1	93.3896	11.1387	36049.4	3055.61	37.6281	3.18455	2.87177	0.515501	17.1102	2.27833	15.2244	2.04634	5.08186	1.30035	3.02475	0.594661	4.7265	0.786873	6.80955	1.31442	8.59389	1.90793	0.19657	0.0414713	0.319168	0.0393887
EBSD map1-31	27373	60418	2.39338	0.957117		3.60736	0.149433	0.754798	0.0251429	0.488249	3447.3	18.9	1576.3	29.1	4838.1	23.8		180.04	3.69		13771.5	433.977	229.035	9.98753	189621	4660.61	170.599	7.5239	22.5404	0.88486	142.634	6.61565	165.758	6.91989	66.2793	2.47619	50.8284	1.85387	54.1265	2.01291	95.3377	4.15004	105.742	4.80916	2.49895	0.119267	2.27614	0.111443
EBSD map1-4	27280	60570	2.88169	0.762302		3.5504	0.165906	0.808796	0.0470971	-0.657849	3531.6	47.6	1599.9	33.9	4936.7	41.4		60.33	1.44		12569.4	837.611	202.417	21.8601	196141	7542.82	97.5395	10.0027	21.0171	0.895455	150.191	9.25219	178.367	10.2597	72.0394	5.50552	48.7479	3.7114	58.8631	4.97867	105.372	7.63321	104.641	9.33043	3.22758	0.347591	2.34766	0.220456
EBSD map1-5	27240	60505	1.53858	2.91175		1.48697	0.201166	0.830205	0.0341285	0.345935	4421	63.1	3310	174	4973.8	29.2		26.83	1.8		30783.9	2779	136.277	14.3193	209314	17625.7	75.5682	5.01724	17.7734	1.52572	96.639	11.1025	78.0296	7.44239	20.1018	2.37204	25.4976	2.31907	16.5349	1.692	26.2447	4.5816	45.0556	4.36394	0.565162	0.125133	1.54874	0.170454
EBSD map1-6	27210	60588	0.00228501	-0.223685		0.00104687	0.000549112	0.838673	0.021118	-0.127298	n.d.	n.d.	n.d.	n.d.	n.d.	n.d.		n.d.	n.d.		715583	29243.3	36.3733	9.99407	376.767	223.874	-1.87156	4.54753	0.125436	0.10549	0.450732	0.248577	0.0578885	0.257103	0.294133	0.267962	0.158601	0.102458	0.946306	0.759216	0.40242	0.308325	0.54144	0.265592	0.0161829	0.0224398	0.023054	0.0108192
EBSD map1-7	27407	60746	0.0121726	5.00641		0.00739334	0.00218595	0.850671	0.0269644	-0.16488	n.d.	n.d.	n.d.	n.d.	n.d.	n.d.		n.d.	n.d.		941815	120929	241.252	94.5616	16448	6057.81	8.94485	6.55345	0.823379	0.615613	2.68891	1.52416	2.81292	2.30091	1.17836	0.83382	0.602562	0.208989	8.97221	3.5603	1.04181	0.834604	0.981531	0.655716	1.04366	0.483545	0.21138	0.0724517
EBSD map1-8	27298	60388	1.47444	0.879536		1.09687	0.268278	0.829626	0.0529884	-0.309778	4725	137	4168	377	4972.8	45.4		40.76	4.99		53144	14528.2	187.552	9.24739	199287	13671.3	92.652	6.4861	22.6791	2.26669	138.877	7.4764	131.328	10.954	42.5488	2.31268	25.8306	1.58463	35.2956	3.38322	56.1716	6.27201	60.2661	6.20116	2.31018	0.200513	1.92364	0.0877128
EBSD map1-9	27441	60296	0.0705119	0.673711		0.0333691	0.00725051	0.841641	0.0214495	-0.0516907	n.d.	n.d.	n.d.	n.d.	n.d.	n.d.		n.d.	n.d.		565600	74511.3	195.687	15.2846	98490.6	18751.6	36.7509	8.29992	3.65906	0.486693	25.172	4.45201	32.0169	11.361	16.4756	4.55759	8.45452	2.90947	16.7552	3.29507	27.7204	7.38698	30.8595	6.31021	1.09461	0.244878	0.609549	0.139981
EBSD map2-1	27773	61333	3.84857	2.09149		5.94044	0.433282	0.745189	0.0290943	0.223165	2951.1	35.7	1003	33.6	4819.8	27.9		122.86	4.4		12753.1	592.829	242.999	8.89136	188499	6770.46	160.75	10.6912	25.0198	1.2313	133.389	7.42901	115.957	6.08284	33.5033	2.54038	31.1079	1.7481	30.2819	2.314	52.7856	6.19858	68.1882	3.13256	1.79774	0.106743	3.56802	0.187794
EBSD map2-10	27582	61658	3.15914	1.29543		3.74925	0.128714	0.772006	0.0398416	-0.267569	3432	34.1	1523.9	23.5	4870.3	36.8		136.49	2.34		15866.7	971.748	172.645	11.2571	176569	7011.58	104.933	5.60831	21.2274	1.4244	111.5	4.91262	95.2958	6.70435	23.9168	1.364	19.8118	1.13283	20.305	1.4162	30.7424	1.48794	41.7172	2.83928	1.90189	0.126536	2.33014	0.149552
EBSD map2-11	27705	61546	2.77904	1.4435		2.59494	0.438652	0.80855	0.0416524	-0.167099	3843	92.2	2105	153	4936.3	36.7		83.23	7.02		47428	10443.8	278.544	23.9352	153922	7093.91	183.496	9.36268	22.2267	2.97315	122.288	13.0182	109.123	6.59727	42.9894	8.11845	29.1381	1.2927	34.1399	4.69476	59.451	13.7367	66.3719	9.57651	2.08763	0.0814333	2.8682	0.347739
EBSD map2-12	27615	61338	2.77097	0.929377		2.35733	0.238632	0.847679	0.0638376	-0.511425	3982.4	76.8	2277.4	97.6	5003.4	53.4		n.d.	n.d.		27736.5	6568.15	185.644	24.3611	178324	16851.6	112.931	17.3493	16.9948	1.33469	110.501	6.79283	128.275	12.5325	55.6566	4.97909	36.0605	3.80996	46.6561	2.71149	91.66	15.3031	95.0295	14.0585	2.49277	0.405038	2.18603	0.359815
EBSD map2-13	27624	61375	3.11659	1.59136		3.13971	0.36613	0.790343	0.0288644	-0.0894177	3629.8	62.4	1782.3	91.7	4903.7	26.1		115.86	6.77		20176.5	2653.4	182.191	9.64056	180320	4376.93	127.667	14.3467	21.0628	1.26145	107.455	5.03605	101.263	4.69044	32.5017	2.14369	29.8146	1.42175	27.8423	1.82573	47.49	3.54558	62.4546	3.87255	1.65046	0.122477	2.50914	0.146221
EBSD map2-14	27492	61923	3.47422	0.385114		2.47188	0.619385	0.772777	0.045455	0.729143	3845	105	2191	233	4871.8	42		203.9	25.2		19778.3	7757.49	182.509	12.9561	178949	13236.3	102.668	9.81667	26.9191	2.80017	157.063	10.6884	148.959	9.3098	45.1192	2.9653	27.8813	2.13589	35.8119	4.46025	54.2264	12.5915	57.9685	6.92503	7.35252	3.13967	2.39087	0.333533
EBSD map2-15	27561	61906	2.64725	0.949341		1.82254	0.336908	0.810165	0.0755144	0.593038	4196.4	75.8	2823	214	4939.1	66.3		111.1	10.3		19795.9	3021.51	157.372	8.94316	169305	8636.34	104.496	7.00938	19.6006	0.955027	112.782	2.80059	114.339	7.08505	38.5393	3.08565	21.465	1.45716	33.6304	4.18561	53.9058	6.73495	60.3178	7.4973	1.81885	0.204322	1.58753	0.129221
EBSD map2-16	27643	61978	4.4033	1.77286		1.66874	0.302251	0.823027	0.0607643	0.698278	4298	69.2	3025	217	4961.4	52.5		59.01	5.28		16445.8	1781.83	247.979	16.0825	164370	8481.86	239.268	49.0106	27.0634	3.99389	147.083	21.4145	122.355	14.9597	34.57	3.78806	23.7494	1.70181	31.8865	3.94252	47.3652	4.61085	58.9421	4.31171	1.54388	0.0761334	2.49771	0.34715
EBSD map2-17	27620	61936	3.86442	0.724052		3.01227	0.869658	0.820299	0.0351636	1	n.d.	n.d.	n.d.	n.d.	n.d.	n.d.		n.d.	n.d.		13716.8	1099.84	201.183	11.4209	174094	33212.4	198.51	15.4722	24.9819	5.62671	129.074	16.1465	134.571	12.2435	54.4067	10.3898	27.1692	0.898939	43.6202	4.65567	81.6697	5.84831	92.1551	15.9962	3.64651	0.634675	2.38006	0.0576783
EBSD map2-2	27845	61391	1.50898	1.06266		1.82432	0.167747	0.795323	0.0294585	-0.209726	4177.8	53.7	2823	107	4912.7	26.4		177.02	8.16		36271	4449.17	211.281	17.5632	200198	5849.26	98.5226	6.32144	21.7136	1.09393	126.931	5.88639	138.487	6.21541	53.1143	2.73508	53.2041	3.58894	46.0947	2.65512	80.7101	4.21038	100.052	4.93157	2.39672	0.554875	2.02984	0.162533
EBSD map2-20	27605	61899	2.81398	1.02218		2.91935	0.404674	0.818211	0.0448067	0.303375	3735.9	65	1899	113	4953.1	38.9		47.17	3.22		14956	884.83	192.833	16.9024	176316	5370.36	214.121	23.6568	22.4695	1.52601	134.758	8.21115	140.881	12.3038	49.5364	6.29395	27.8982	2.91226	42.9172	5.43078	74.3397	10.1052	80.0989	9.49298	2.49793	0.667444	1.93686	0.216767
EBSD map2-21	27703	61683	1.99811	1.69019		2.89142	0.164442	0.824374	0.0418406	0.318463	3753.6	30.7	1915.6	45.9	4963.8	36		30.2	0.83		14421.2	748.658	176.619	14.9946	184667	6465.23	165.479	28.5761	20.0649	1.35932	101.622	5.50849	82.4027	4.89207	19.9832	1.46931	21.4954	1.36934	17.5516	1.13571	24.1896	1.75374	34.3436	2.1692	1.17307	0.20327	1.80314	0.117931
EBSD map2-22	27647	61695	2.22109	1.81903		3.4805	0.186453	0.80203	0.0345862	0.606017	3542.9	21.8	1628.3	39.3	4924.7	30.7		77.39	2.1		14232.3	488.595	174.725	11.5639	187513	5699.36	144.416	14.0673	23.6347	1.65217	114.854	6.33113	96.4902	5.47689	23.8642	1.05651	22.6651	0.883302	21.2406	1.10753	28.1853	1.20075	39.9324	2.55238	1.26377	0.107933	2.17925	0.10576
EBSD map2-23	27835	61434	2.82199	1.2809		3.44333	0.213718	0.82148	0.0429269	0.243198	3578	34.6	1645	44.3	4958.8	37.1		32.24	0.98		14013.1	1202.82	182.815	6.45951	188121	6368.69	106.584	6.43252	20.3913	0.650407	123.663	5.7908	115.54	4.58818	36.7568	1.85884	37.931	1.75712	31.0779	2.04478	49.9213	3.49539	67.0458	4.56497	2.08135	0.363948	2.43862	0.167161
EBSD map2-4	27871	61492	1.58762	1.01737		2.95183	0.128111	0.786874	0.0355161	0.324125	3687.2	25.7	1881.8	36	4897.6	32.2		132.57	2.89		15446.3	640.431	211.969	11.1024	185939	4590.84	180.952	18.683	17.6706	0.774494	95.2531	4.1107	99.7014	6.7073	37.1104	3.63868	32.9506	2.52802	32.3369	3.14253	64.686	7.72537	78.2134	7.06654	2.06291	0.462461	1.69969	0.131417
EBSD map2-5	27712	61633	1.23606	0.646432		1.66832	0.133432	0.794476	0.0514605	0.0947554	4262.8	48.4	3025	94	4911.3	46.2		196.61	7.54		34601.5	4144.61	158.648	13.7791	175280	6447.16	88.1922	6.76925	14.1259	0.996092	88.3557	5.4527	88.2564	5.25631	32.4429	2.57974	19.4157	1.15645	28.2591	2.25136	50.2273	4.70655	63.566	7.34723	2.72147	0.97411	1.46495	0.108638
EBSD map2-6	27706	61727	5.25017	2.07104		7.41696	0.614374	0.721194	0.0334024	0.262409	2707.9	39.3	815	31.5	4772.9	33.2		124.6	5.07		15667.7	1242.73	433.075	50.6962	180586	4357.68	421.424	34.28	46.797	3.97809	191.878	13.4723	148.284	11.0672	34.6796	2.93449	33.0933	2.70012	30.4731	2.49939	39.3087	3.21637	56.0464	4.04621	3.09238	0.309094	6.231	0.718483
EBSD map2-7	27623	61741	2.04377	0.748509		2.9576	0.15367	0.786147	0.0192042	0.133523	3682.8	26.3	1876.3	41.2	4896.1	17.4		134.3	3.37		15154.3	771.888	172.839	11.0433	180250	5215.32	116.755	8.0091	23.7588	1.4006	122.926	6.84409	106.555	7.08212	26.8041	1.20453	22.6175	1.27725	22.3557	1.18969	31.2501	1.34627	39.2024	1.71675	2.60459	0.262224	1.91281	0.0559495
EBSD map2-8	27658	61610	2.87272	0.845361		1.01093	0.171134	0.785784	0.0524831	0.535238	4756.3	72.3	4436	270	4895.6	47.6		391	31.9		58079.9	10757.2	260.296	59.0223	190011	16389.3	166.064	26.1066	24.1435	3.47205	156.382	27.6457	134.718	16.3709	40.9592	2.17076	33.8343	4.00366	33.9189	2.22397	52.9841	4.06184	61.0757	3.23091	4.47052	0.487672	3.71351	1.12068
EBSD map2-9	27660	61653	3.04467	0.848321		3.80229	0.292448	0.810411	0.0536933	0.574576	3466.7	32.8	1506	51.2	4939.5	47.2		52.96	2.01		13783.9	1496.71	147.638	18.7036	172260	12314.6	124.812	12.303	18.3757	1.54412	98.0075	9.7715	81.6581	7.11949	19.4271	1.52121	20.9386	1.61661	16.3732	1.05626	26.4385	2.48403	36.9382	4.45716	2.64499	0.363083	2.12006	0.209626
EBSD map4-1	37814	69947	1.42988	4.52916		3.1651	0.165785	0.741483	0.0304843	0.535625	3557.6	23	1767.5	41.5	4812.7	29.4		238.28	6.27		15603.9	663.094	170.303	7.83229	192047	5948.82	123.564	5.99949	30.0982	1.45501	206.224	8.44069	328.572	14.3579	195.79	10.0549	52.9478	1.9766	166.613	7.9187	369.114	15.7029	312.614	14.5623	0.373364	0.0225894	1.70451	0.071174
EBSD map4-2	37757	69924	1.94929	2.20861		2.75083	0.0899524	0.762674	0.0361113	0.56319	3725.7	19.6	1999.4	28.1	4853	33.8		212.73	3.42		16461.7	683.13	203.056	14.9862	190878	5976.99	125.518	7.51657	29.1823	1.43165	200.967	11.127	297.513	18.1542	168.602	11.8186	48.5345	2.89719	136.443	10.3194	286.552	24.9193	252.511	19.674	0.952665	0.142938	1.98997	0.135823
EBSD map4-3	37735	69811	0.50648	8.61908		0.0713691	0.00337066	0.83325	0.0291603	0.000787947	n.d.	n.d.	n.d.	n.d.	n.d.	n.d.		n.d.	n.d.		163847	13871.8	166.93	10.2909	211797	8872.24	103.511	6.48985	23.9781	1.67346	180.259	15.9883	283.471	19.4062	169.18	8.4223	50.4614	2.26597	138.384	6.91574	276.275	16.9795	243.912	15.0751	0.208347	0.043216	1.61621	0.234841
EBSD map4-4	37723	69753	2.51176	2.83562		2.72367	0.0789886	0.790212	0.0307765	0.171883	3771.6	22.1	2018.3	25.5	4903.5	27.8		133.92	1.95		16765.1	577.085	153.578	8.58197	192661	6189.38	104.723	7.86169	23.4136	1.9851	177.899	6.92805	256.862	12.4387	137.056	8.12378	44.5261	2.2966	110.162	5.43805	217.908	13.1222	203.579	13.6688	0.898456	0.174639	2.13185	0.122612
EBSD map4-5	37755	69683	3.21839	7.59383		4.26144	0.210238	0.741724	0.0365269	0.612147	3268.2	21.2	1359.3	30.2	4813.1	35.2		177.48	4.31		14172	844.514	298.098	18.9264	198409	5358.9	157.947	9.70647	34.1322	2.15882	229.385	14.2093	340.746	23.6227	186.563	10.4105	63.479	3.67191	156.08	4.07404	305.916	11.378	296.239	16.2135	0.472541	0.0439311	3.3436	0.202092
EBSD map4-6	37778	69723	4.02097	0.885109		0.796018	0.0535395	0.824798	0.0264075	0.437482	5039.8	28.4	5228	112	4964.5	22.7		104.61	3.24		16410.3	1108.22	292.835	17.386	199891	7767.48	136.006	8.47902	33.0729	2.32096	232.488	12.2466	330.502	18.459	182.733	12.2838	61.1223	4.67549	151.805	10.1133	297.459	17.9883	281.706	14.9115	4.18599	0.361977	3.49054	0.180851
EBSD map4-7	37738	69873	2.19075	4.27331		0.51312	0.0304315	0.833907	0.0497585	0.619655	5505.5	26.1	6997	126	4980.1	42.4		19.2	0.56		34341.4	1628.22	148.454	10.7842	192435	5111.22	96.4189	7.56204	23.1957	1.42121	195.907	10.9459	289.608	17.2684	163.404	9.07445	53.1144	2.80617	132.331	9.19428	257.062	19.5415	242.319	13.7589	0.582202	0.146193	2.20812	0.156519
EBSD map5-1	38350	67536	2.39646	10.1829		3.52604	0.269527	0.824378	0.0449702	-0.227304	3556	51.1	1607.9	54.4	4963.8	38.8		24.73	0.94		13506.3	1135.44	160.568	7.20649	179620	9688.74	78.0218	4.16252	22.6089	1.22298	154.236	5.75517	173.768	10.7302	67.5801	5.82216	31.6933	2.17235	53.984	5.59432	83.0125	6.85097	94.8082	7.9518	0.197916	0.0361257	1.85976	0.120333
EBSD map5-2	38300	67666	3.2791	6.16497		3.54226	0.276805	0.819661	0.0508101	-0.393227	3547.6	58.1	1603.9	56.2	4955.7	44.1		35.47	1.4		24343.9	3418.91	342.692	18.5672	178256	10706.1	204.415	21.9678	33.4633	1.97619	219.752	23.1482	263.751	16.3419	115.897	8.10868	36.0923	2.66068	89.4435	10.0552	131.824	14.8261	121.424	11.2368	0.57787	0.14023	3.04036	0.233494
EBSD map5-3	38363	67684	2.81357	13.454		3.74515	0.151628	0.798978	0.0341683	0.249039	3465.8	24.9	1523.9	27.1	4919.3	30.5		78.33	1.56		16715.3	1325.48	313.36	20.6667	189193	6843.88	93.7968	6.78723	34.7866	1.47956	200.9	15.2384	209.429	12.9492	70.1134	5.06575	35.7867	1.9857	53.7932	2.88617	82.8172	6.33888	104.564	9.39231	0.195261	0.0228824	2.46315	0.236156
EBSD map5-4	38355	67591	1.34936	14.7699		2.18009	0.121486	0.838994	0.051527	0.61261	4051.1	25.8	2433.9	55.8	4988.8	43.6		n.d.	n.d.		14177.1	874.198	126.184	8.2657	183006	6278.61	54.2271	3.34095	19.7165	0.652592	128.418	5.48318	134.632	7.83531	46.6488	3.01779	25.5404	1.32458	36.3802	3.46704	56.085	5.47452	67.0102	4.34863	0.0855784	0.0152593	1.09631	0.0715894
EBSD map5-5	38294	67560	0.00857397	0.169778		0.00605253	0.00194481	0.850517	0.0267117	-0.510144	n.d.	n.d.	n.d.	n.d.	n.d.	n.d.		n.d.	n.d.		202209	14182.9	66.8364	5.42973	11008.7	1321.88	28.7737	2.61642	1.09314	0.185536	5.74543	0.747848	7.70374	1.30162	3.54864	0.531285	0.456271	0.0986214	4.04385	0.401018	5.51956	0.546928	5.67917	0.577008	0.198426	0.0494576	0.0312713	0.00934424
¶ Data not corrected for common-Pb.
† 206Pb/238U ages common lead corrected by inferring the initial Pb-composition from the Stacey and Kramers (1975) two stage isotope evolution model (Vermeesch, 2018). Analyses with greater than 10% uncertainty in 207Pb/206Pb age (1-sigma) or 5% uncertainty in 206Pb/238U age (1-sigma), 20% discordance, and/or 5% reverse discordance are excluded. Accepted ages calculated using 206Pb/238U ages for …
[truncated: 6 more columns]

## Sheet: Table 3. U-Pb data standard
Supplementary Table 3. U-Pb isotope data for standards
						Isotope Ratios					Apparent Ages													Notes		Trace Elements
			U	U/Th		238U	2 sigma	207Pb	2 sigma	207Pb/206Pb vs	207/235	1 sigma	206/238	1 sigma	207/206	1 sigma		Best age	1 sigma		% discordance					Al27_ppm_mean	Al27_ppm_2SE(int)	P31_ppm_mean	P31_ppm_2SE(int)	Ti49_ppm_mean	Ti49_ppm_2SE(int)	Zr91_ppm_mean	Zr91_ppm_2SE(int)	La139_ppm_mean	La139_ppm_2SE(int)	Ce140_ppm_mean	Ce140_ppm_2SE(int)	Nd142_ppm_mean	Nd142_ppm_2SE(int)	Sm152_ppm_mean	Sm152_ppm_2SE(int)	Eu153_ppm_mean	Eu153_ppm_2SE(int)	Gd157_ppm_mean	Gd157_ppm_2SE(int)	Dy164_ppm_mean	Dy164_ppm_2SE(int)	Yb174_ppm_mean	Yb174_ppm_2SE(int)
Analysis	Position (x)	Position (y)	(ppm)			206Pb	abs	206Pb	abs	238U/206Pb	age	abs err	age	abs err	age	abs err		age†	abs err		6/8 vs. 7/5	6/8 vs. 7/6
										error corr	Ma	Ma	Ma	Ma	Ma	Ma		Ma	Ma
BHVO2-1	59189	28460	0.413571	0.255041		0.898547	0.0218955	0.830277	0.0344305	-0.267433	n.d.	n.d.	n.d.	n.d.	n.d.	n.d.		n.d.	n.d.		n.d.	n.d.				76440.6	3589.05	552.192	30.2021	17224	680.16	137.687	7.07613	13.5228	0.683888	35.0407	1.90721	24.4109	1.6148	5.56947	0.339951	1.98353	0.136326	5.60797	0.420756	4.27702	0.282142	1.78027	0.0998216
BHVO2-2	59144	28353	0.391597	0.271089		0.870219	0.0415251	0.829459	0.0401325	0.460417	n.d.	n.d.	n.d.	n.d.	n.d.	n.d.		n.d.	n.d.		n.d.	n.d.				74979.4	2940.52	675.963	40.1496	16897.9	633.55	136.212	7.73447	13.8996	0.792935	35.5633	1.65345	24.8649	1.27805	5.48353	0.272047	1.9587	0.119255	5.64849	0.300245	4.19375	0.290197	1.7712	0.105849
BHVO2-3	59169	28403	0.383689	0.278121		0.881061	0.032215	0.810882	0.0324381	0.409333	n.d.	n.d.	n.d.	n.d.	n.d.	n.d.		n.d.	n.d.		n.d.	n.d.				80939.4	4544.66	879.993	47.657	17561.5	815.069	139.474	6.70496	13.863	0.491759	35.9295	2.00224	24.9694	1.49328	5.65715	0.333153	2.06524	0.129172	5.8794	0.358554	4.51185	0.279044	1.773	0.11458
BHVO2-4	59269	28605	0.246093	0.477565		0.861915	0.0363978	0.870233	0.0369399	0.418793	n.d.	n.d.	n.d.	n.d.	n.d.	n.d.		n.d.	n.d.		n.d.	n.d.				78431.8	3423.73	318.775	12.0073	17825.5	579.954	148.963	5.99701	13.6144	0.558561	36.0896	1.75693	25.3695	0.95911	5.67711	0.396564	2.10639	0.14131	5.9775	0.308894	4.40188	0.23515	1.79414	0.116579
BHVO2-5	59243	28563	0.250766	0.475386		0.848374	0.0322074	0.842983	0.0333348	0.62236	n.d.	n.d.	n.d.	n.d.	n.d.	n.d.		n.d.	n.d.		n.d.	n.d.				76912.4	4270.54	325.118	15.4067	17250	602.108	139.791	6.62449	13.9441	0.727222	34.9395	2.05834	24.7064	1.69523	5.47452	0.38004	1.94147	0.0955742	5.64357	0.304689	4.1308	0.253513	1.80009	0.141266
BHVO2-6	59224	28513	0.267329	0.478752		0.86138	0.0365631	0.833986	0.0297082	0.561967	n.d.	n.d.	n.d.	n.d.	n.d.	n.d.		n.d.	n.d.		n.d.	n.d.				76606.3	4473.2	337.517	19.7196	17552.4	854.926	133.051	7.35974	13.5692	0.672578	34.9837	2.0494	24.9857	1.64517	5.55859	0.414541	1.92606	0.112247	5.82843	0.391838	4.28638	0.301122	1.75632	0.138977
BHVO2-7	59286	28653	0.764839	0.390003		0.911922	0.0265541	0.86514	0.0276138	0.462454	n.d.	n.d.	n.d.	n.d.	n.d.	n.d.		n.d.	n.d.		n.d.	n.d.				76302.3	2944.74	591.876	27.6801	17513.3	625.497	136.314	4.21281	14.2228	0.670172	37.5792	1.30702	25.3359	0.983625	5.23896	0.269758	1.88119	0.112015	5.24494	0.271238	4.07684	0.157215	1.77679	0.125286
BHVO2-8	59309	28698	0.879045	0.379006		0.92538	0.0476943	0.85036	0.0416338	0.440601	n.d.	n.d.	n.d.	n.d.	n.d.	n.d.		n.d.	n.d.		n.d.	n.d.				74345.7	3370.7	445.693	20.1585	17668.6	796.994	135.849	9.41858	13.9662	0.703451	36.3534	1.96999	25.2855	1.37757	5.40218	0.310213	1.85918	0.115311	5.2286	0.346383	4.1343	0.338158	1.65417	0.143902
BHVO2-9	59124	28305	0.921648	0.369645		0.894174	0.0437894	0.829908	0.0320996	0.400072	n.d.	n.d.	n.d.	n.d.	n.d.	n.d.		n.d.	n.d.		n.d.	n.d.				74508.2	2885.13	369.554	18.1005	17407.7	369.21	141.417	5.60736	14.4087	0.565294	38.4863	1.81884	25.8455	1.08594	5.5114	0.316644	1.91267	0.101715	5.31294	0.205652	4.23119	0.321886	1.72167	0.0862286
BHVO2-1	59121	28410	0.343982	0.38046		0.862614	0.0449573	0.843557	0.0355994	0.592214	n.d.	n.d.	n.d.	n.d.	n.d.	n.d.		n.d.	n.d.		n.d.	n.d.				74709.6	3871.33	947.583	46.8497	16445.2	621.348	140.408	7.52981	14.0737	0.475631	37.9269	1.54418	26.0865	0.813457	5.58233	0.227329	1.89266	0.0913306	5.45534	0.294639	4.11476	0.306156	1.61595	0.115654
BHVO2-2	59078	28316	0.379394	0.397336		0.873588	0.0390262	0.846931	0.0345177	0.331162	n.d.	n.d.	n.d.	n.d.	n.d.	n.d.		n.d.	n.d.		n.d.	n.d.				76178	3752.58	1262.61	64.8146	16360.7	672.394	137.329	5.85499	13.6381	0.57516	36.0421	1.41643	25.4915	1.48908	5.39868	0.394106	2.01027	0.12897	5.82591	0.342029	3.9983	0.255839	1.71054	0.155601
BHVO2-3	59099	28363	0.408045	0.370556		0.824373	0.040258	0.832251	0.0421894	0.39921	n.d.	n.d.	n.d.	n.d.	n.d.	n.d.		n.d.	n.d.		n.d.	n.d.				74256.3	4522.2	1091.11	50.4663	16170	448.575	134.749	9.12523	12.855	0.594849	35.0023	1.81476	23.8217	1.1258	5.43688	0.378846	1.9512	0.155732	5.83397	0.410466	4.03578	0.236403	1.66907	0.106229
BHVO2-4	59143	28461	0.300284	0.40534		0.903514	0.0347068	0.881674	0.0336003	0.138241	n.d.	n.d.	n.d.	n.d.	n.d.	n.d.		n.d.	n.d.		n.d.	n.d.				71450.2	2404.87	1110.51	43.4501	17414.2	407.518	135.673	5.07341	13.8715	0.479772	38.5424	1.94167	26.3711	0.987284	5.60369	0.216601	2.04767	0.116723	5.37032	0.294281	4.26955	0.226176	1.76143	0.140209
BHVO2-1	59064	28416	0.402206	0.389453		0.863605	0.0418709	0.868015	0.0446556	0.621356	n.d.	n.d.	n.d.	n.d.	n.d.	n.d.		n.d.	n.d.		n.d.	n.d.				74207.1	3735.84	1198.89	61.8181	16882.1	521.137	132.816	4.25358	13.424	0.440573	35.3454	1.23534	24.7783	0.958296	5.6452	0.307954	1.95194	0.0917274	5.81456	0.28898	4.14016	0.214908	1.67035	0.121869
BHVO2-2	59020	28323	0.411996	0.393876		0.824938	0.044428	0.832602	0.034685	0.266172	n.d.	n.d.	n.d.	n.d.	n.d.	n.d.		n.d.	n.d.		n.d.	n.d.				74363.8	3604.81	1254.82	53.9732	17033.1	508.64	138.746	6.44311	13.8279	0.561531	36.8853	1.73061	25.4741	1.16185	5.7111	0.424428	2.00837	0.128728	5.92635	0.364491	4.21586	0.332532	1.61725	0.0845364
BHVO2-3	59041	28369	0.3939	0.393487		0.87099	0.0477654	0.825284	0.0310892	0.260222	n.d.	n.d.	n.d.	n.d.	n.d.	n.d.		n.d.	n.d.		n.d.	n.d.				76896.4	2580.64	1238.68	68.5454	16540.5	549.498	141.281	5.83313	14.1807	0.533225	36.4612	1.31342	24.8184	0.904536	5.54192	0.389188	1.88239	0.127638	5.6997	0.325134	4.38149	0.280903	1.72631	0.0867397
BHVO2-4	59085	28468	0.298805	0.389521		0.89954	0.057402	0.811337	0.0352871	0.46439	n.d.	n.d.	n.d.	n.d.	n.d.	n.d.		n.d.	n.d.		n.d.	n.d.				67543.3	2961.52	1062.34	50.6555	15079.5	591.774	134.105	6.53675	13.8959	0.557691	37.3159	1.96329	25.8406	1.13543	5.27173	0.285142	1.79564	0.103297	4.84636	0.351988	4.22818	0.383664	1.5523	0.120797
BHVO2-1	59018	28436	0.277176	0.371538		0.871627	0.049322	0.818567	0.0404185	0.363216	n.d.	n.d.	n.d.	n.d.	n.d.	n.d.		n.d.	n.d.		n.d.	n.d.				69003.3	2372.63	1094.22	57.008	17621.3	523.603	140.487	3.48002	14.7414	0.571104	38.4528	1.46036	26.7927	1.10972	5.45347	0.280507	1.88027	0.118266	5.07274	0.278094	4.35119	0.241054	1.76355	0.114305
BHVO2-2	58974	28342	0.384531	0.406471		0.8512	0.0462602	0.835563	0.0373102	0.590942	n.d.	n.d.	n.d.	n.d.	n.d.	n.d.		n.d.	n.d.		n.d.	n.d.				76109	3010.03	1374.08	64.0363	17987.5	606.042	138.842	6.80255	13.7667	0.502937	36.3677	1.46466	25.8106	0.930764	5.63435	0.289158	1.94877	0.12146	6.08027	0.288973	4.21322	0.265405	1.64231	0.116762
BHVO2-3	58995	28388	0.385757	0.388216		0.867359	0.0419029	0.82899	0.0398248	0.268475	n.d.	n.d.	n.d.	n.d.	n.d.	n.d.		n.d.	n.d.		n.d.	n.d.				77220	3497.81	1385.79	61.7115	17534.6	611.564	138.342	5.20063	13.6404	0.634609	35.9471	1.63593	25.4473	1.39957	5.50647	0.4161	1.87496	0.13147	5.74441	0.415313	4.56841	0.279935	1.66528	0.124838
BHVO2-4	59039	28487	0.294727	0.382306		0.880812	0.0516567	0.827735	0.0399179	0.143657	n.d.	n.d.	n.d.	n.d.	n.d.	n.d.		n.d.	n.d.		n.d.	n.d.				68675.8	2171.83	1024.07	47.1171	16041.2	485.759	140.892	5.80736	14.7986	0.637132	38.466	1.26919	27.8627	1.17424	5.76529	0.326161	1.92466	0.124371	5.24046	0.290692	4.3906	0.324766	1.71723	0.143325
BHVO2-1	48839	39597	0.331396	0.365499		0.856112	0.0439275	0.834319	0.0338766	0.349169	n.d.	n.d.	n.d.	n.d.	n.d.	n.d.		n.d.	n.d.		n.d.	n.d.				71865.3	4144.95	1316.47	81.6453	17211.2	552.22	142.121	6.98617	13.2375	0.556308	33.7325	1.45852	24.2428	1.0124	5.28261	0.348973	1.87808	0.145399	5.90869	0.341396	4.23953	0.268995	1.8169	0.142379
BHVO2-2	48916	39644	0.320766	0.387031		0.861076	0.04173	0.839849	0.0342478	0.198251	n.d.	n.d.	n.d.	n.d.	n.d.	n.d.		n.d.	n.d.		n.d.	n.d.				71541.4	2753.95	1309.13	75.9493	17626.2	698.053	138.861	6.39193	12.944	0.559016	33.6914	1.62805	24.1617	1.14942	5.30893	0.3832	1.83787	0.131126	5.37149	0.348807	4.15504	0.315713	1.7235	0.118601
BHVO2-3	48771	39584	0.296738	0.378077		0.885667	0.04692	0.881973	0.0585738	0.801611	n.d.	n.d.	n.d.	n.d.	n.d.	n.d.		n.d.	n.d.		n.d.	n.d.				76918.5	4037.8	1282.73	69.7874	18125.7	1049.76	139.579	5.8512	13.9974	0.557685	34.7119	1.77752	25.6662	0.939684	5.66165	0.418689	1.95531	0.115081	5.80204	0.392555	4.34109	0.297833	1.74172	0.170913
BHVO2-4	48888	39603	0.33944	0.391403		0.901967	0.0517494	0.860347	0.0441115	0.232294	n.d.	n.d.	n.d.	n.d.	n.d.	n.d.		n.d.	n.d.		n.d.	n.d.				69004.4	3149.07	1003.09	50.852	15656.4	527.454	140.615	5.32936	14.9657	0.592292	38.4877	1.67277	27.0641	0.914017	5.57199	0.326069	2.1012	0.19532	5.63097	0.377863	4.53241	0.354475	1.61814	0.176579
BHVO2-1	48933	39684	0.313637	0.361237		0.803696	0.0451086	0.831425	0.043619	0.452901	n.d.	n.d.	n.d.	n.d.	n.d.	n.d.		n.d.	n.d.		n.d.	n.d.				75379.6	3313.19	1359.62	80.8578	16194.1	650.692	138.206	7.03328	13.7832	0.546338	34.1997	1.17573	25.3765	0.789004	5.57543	0.342822	1.8378	0.122369	5.97868	0.367633	4.36151	0.292667	1.87559	0.170023
BHVO2-2	48801	39615	0.31215	0.386229		0.814689	0.0316696	0.836173	0.0306768	-0.306558	n.d.	n.d.	n.d.	n.d.	n.d.	n.d.		n.d.	n.d.		n.d.	n.d.				74585.4	2430.68	1361.49	63.2718	17360.6	637.018	133.293	5.71668	13.3471	0.534791	33.4538	1.33145	23.8574	0.681181	5.521	0.410759	1.94455	0.110287	5.83141	0.319466	4.30403	0.336422	1.70368	0.141139
BHVO2-3	48951	39729	0.309659	0.400169		0.875401	0.0445876	0.827134	0.0333405	0.0259482	n.d.	n.d.	n.d.	n.d.	n.d.	n.d.		n.d.	n.d.		n.d.	n.d.				73015.6	2646.71	1427.94	51.665	16049.5	639.637	139.657	6.78933	13.8159	0.775894	33.9511	1.71102	23.5698	0.954886	5.34205	0.416698	1.8668	0.114929	5.53469	0.344396	4.1364	0.280717	1.78588	0.13667
BHVO2-4	48859	39625	0.341944	0.408939		0.873262	0.0737005	0.833477	0.0469881	0.517985	n.d.	n.d.	n.d.	n.d.	n.d.	n.d.		n.d.	n.d.		n.d.	n.d.				67281.9	2577.75	969.58	36.8931	15075.6	469.543	147.931	7.46855	14.5281	0.546587	38.2531	1.33861	26.15	1.12782	5.81131	0.425483	1.95445	0.171663	5.36637	0.355587	4.28141	0.299893	1.82063	0.189182
BHVO2-1	48895	39710	0.207518	0.365069		0.958363	0.03934	0.845182	0.03772	0.216461	n.d.	n.d.	n.d.	n.d.	n.d.	n.d.		n.d.	n.d.		n.d.	n.d.				68169.9	3082.77	1084.83	49.326	16166.2	642.543	147.005	6.76933	14.9572	0.725462	38.9918	1.62825	26.8086	1.01313	5.73117	0.395257	2.06281	0.153105	5.37876	0.540843	4.17093	0.29192	1.86224	0.181037
BHVO2-2	48804	39661	0.169175	0.384179		0.998985	0.0578596	0.806771	0.0618988	0.318122	n.d.	n.d.	n.d.	n.d.	n.d.	n.d.		n.d.	n.d.		n.d.	n.d.				64787.3	2449.15	1150.44	46.5661	16265.8	819.733	153.924	8.47656	17.0154	0.684368	44.8361	1.90473	31.8012	1.7424	6.4586	0.489862	2.3247	0.207767	5.42033	0.464648	5.06845	0.366407	1.96459	0.255627
BHVO2-3	48914	39755	0.26559	0.390111		0.905124	0.0410219	0.830402	0.0436908	0.370013	n.d.	n.d.	n.d.	n.d.	n.d.	n.d.		n.d.	n.d.		n.d.	n.d.				71943.8	3168.78	1140.61	48.7577	17340.8	461.039	143.235	6.35718	14.2897	0.534671	37.7335	1.54835	26.277	1.06009	6.08735	0.346325	2.08349	0.142106	5.33484	0.396284	4.54193	0.352182	1.89028	0.227874
NIST612-1	62553	57669	34.8886	0.789171		3.51267	0.0772887	0.894326	0.0167774	0.358586	n.d.	n.d.	n.d.	n.d.	n.d.	n.d.		n.d.	n.d.		n.d.	n.d.				11150.6	405.121	46.7226	2.71067	43.9033	1.59754	36.769	1.62285	35.7737	1.74684	37.787	1.84801	35.3727	1.74964	37.8165	1.75747	35.2397	1.40706	37.442	1.54594	36.2989	1.49369	39.2636	1.94846
NIST612-2	62606	57666	34.6835	0.843995		3.58318	0.0851806	0.918174	0.0179988	0.348881	n.d.	n.d.	n.d.	n.d.	n.d.	n.d.		n.d.	n.d.		n.d.	n.d.				11532.1	412.831	45.692	4.29855	43.2072	1.58915	37.7662	1.54949	35.8401	1.46048	38.5629	1.50079	35.5681	1.35763	37.977	1.73709	36.2661	1.80963	37.8029	1.8923	35.5027	1.65053	39.8276	1.90538
NIST612-3	62671	57669	34.8765	0.888941		3.62425	0.0903886	0.91453	0.0162203	0.3445	n.d.	n.d.	n.d.	n.d.	n.d.	n.d.		n.d.	n.d.		n.d.	n.d.				11193.4	334.236	46.5041	2.92098	45.291	1.82573	38.8906	1.39203	36.2403	0.887506	38.6593	0.832974	35.7261	0.974312	37.8703	1.05009	36.0052	1.25714	38.3013	1.38027	36.1061	1.13392	39.5195	1.34498
NIST612-4	62729	57671	59.2124	1.01175		3.48753	0.093424	0.919912	0.0211811	0.511151	n.d.	n.d.	n.d.	n.d.	n.d.	n.d.		n.d.	n.d.		n.d.	n.d.				11162.5	377.076	46.7424	2.97877	44.2047	2.43667	38.787	2.15251	36.1028	1.39568	38.3919	1.57272	35.3778	1.57617	37.0618	1.3644	35.383	1.55295	37.4532	1.58191	34.7709	1.82111	38.9455	1.4957
NIST612-5	62788	57673	65.949	0.998333		3.54249	0.0674804	0.920431	0.0194463	0.617321	n.d.	n.d.	n.d.	n.d.	n.d.	n.d.		n.d.	n.d.		n.d.	n.d.				11466.6	432.883	46.083	3.664	42.1522	2.0889	36.9923	1.6945	35.8181	1.00542	38.1963	1.15726	35.1532	1.08847	37.792	1.44076	35.67	1.26924	36.3741	1.24548	34.8771	1.58708	38.1477	1.5547
NIST612-6	62846	57674	73.0885	1.00425		3.5145	0.0850585	0.937217	0.0231427	0.659581	n.d.	n.d.	n.d.	n.d.	n.d.	n.d.		n.d.	n.d.		n.d.	n.d.				11364.2	429.409	46.1448	3.52978	45.5586	2.1068	38.3512	2.02599	35.5256	1.40557	37.7081	1.27149	35.2342	1.33558	37.0123	1.76267	34.837	1.34278	36.4889	1.48828	34.5768	1.65688	39.1253	1.88643
NIST612-1	62550	57613	32.801	0.95468		3.51491	0.0771009	0.918643	0.0195427	0.0329449	n.d.	n.d.	n.d.	n.d.	n.d.	n.d.		n.d.	n.d.		n.d.	n.d.				11022.2	341.197	46.6296	3.55698	43.9859	1.47724	38.1983	1.95749	36.6255	1.21901	39.6745	1.73362	36.2877	1.74502	38.2308	1.15956	36.3299	1.01385	38.7202	1.3945	36.0789	1.54227	40.1	1.70645
NIST612-2	62604	57610	31.6768	1.01091		3.49346	0.0781414	0.910767	0.0192336	-0.0216953	n.d.	n.d.	n.d.	n.d.	n.d.	n.d.		n.d.	n.d.		n.d.	n.d.				10982	289.628	46.5914	2.73458	43.9665	1.75661	37.0575	1.69442	35.833	0.966636	38.0821	1.18058	35.3072	0.828913	37.3795	1.57441	34.7501	1.29829	36.5828	1.19551	35.4494	1.11112	39.0011	1.52139
NIST612-3	62668	57609	33.6081	0.944686		3.48585	0.0683464	0.923043	0.0223348	0.283545	n.d.	n.d.	n.d.	n.d.	n.d.	n.d.		n.d.	n.d.		n.d.	n.d.				11401.2	442.281	46.6013	2.69319	44.2906	1.73817	38.0576	0.925437	36.1513	0.982315	38.726	1.12111	36.2825	1.22418	37.6722	1.22607	35.4878	1.36779	36.6843	1.36892	34.7993	1.19239	39.6381	1.56596
NIST612-4	62726	57615	30.6955	1.02149		3.50618	0.0811196	0.941701	0.018217	0.271559	n.d.	n.d.	n.d.	n.d.	n.d.	n.d.		n.d.	n.d.		n.d.	n.d.				11403.9	458.062	46.5992	2.36491	43.3445	2.45257	38.1155	1.50791	35.9286	0.922766	38.65	1.49849	35.4237	0.991303	38.053	1.41806	35.9403	1.58414	37.7808	1.48729	35.5979	1.52574	38.8662	1.21471
NIST612-1	62553	57556	31.8274	0.937177		3.4442	0.0827293	0.926681	0.0185549	0.470166	n.d.	n.d.	n.d.	n.d.	n.d.	n.d.		n.d.	n.d.		n.d.	n.d.				11200.9	356.534	46.6002	2.51095	44.3901	1.78953	37.8031	1.76932	35.7839	1.30687	38.2562	1.59898	35.2411	1.3368	37.1789	1.64725	35.2624	1.07866	37.4482	1.22349	35.4269	0.840143	39.2736	1.22704
NIST612-2	62606	57553	33.101	0.985389		3.47755	0.0844189	0.902617	0.0241215	0.412705	n.d.	n.d.	n.d.	n.d.	n.d.	n.d.		n.d.	n.d.		n.d.	n.d.				11072.1	552.245	46.6004	2.13776	43.2445	2.36954	38.2912	2.12607	35.6984	1.59008	38.5492	1.52562	35.7043	1.5133	38.4416	1.55081	36.0276	1.25869	37.4605	1.29654	36.3964	1.91631	39.2583	1.76409
NIST612-3	62670	57552	31.6769	0.97445		3.49797	0.0631912	0.91814	0.0172534	0.263235	n.d.	n.d.	n.d.	n.d.	n.d.	n.d.		n.d.	n.d.		n.d.	n.d.				10895.8	375.513	46.5991	2.59188	44.0718	1.93805	36.9188	1.66375	36.1748	1.01761	37.9309	1.27906	35.416	1.15758	37.2873	0.99489	35.0418	1.20686	36.7671	1.24665	35.3065	1.37983	39.207	1.582
NIST612-4	62729	57558	31.2225	0.948273		3.35668	0.0848313	0.909145	0.0198564	0.280637	n.d.	n.d.	n.d.	n.d.	n.d.	n.d.		n.d.	n.d.		n.d.	n.d.				11184.7	316.343	46.5987	2.47886	44.2333	1.6833	38.2739	1.65756	35.8428	1.14672	37.865	1.58013	35.3352	1.41512	37.2862	1.22305	35.6361	1.19715	37.5029	1.27971	35.6972	1.46784	38.6581	1.69687
NIST612-1	62555	57503	32.4713	0.975686		3.39745	0.0814159	0.898352	0.0225483	0.367449	n.d.	n.d.	n.d.	n.d.	n.d.	n.d.		n.d.	n.d.		n.d.	n.d.				10987.2	361.83	46.6001	2.08021	43.1235	2.70861	39.1504	1.6474	36.2302	1.1438	38.8186	1.14368	36.1285	1.43365	38.356	1.27934	36.5805	1.37808	37.9916	1.70853	36.6596	1.46764	39.8276	1.73545
NIST612-2	62609	57500	30.7503	1.01324		3.55034	0.0642811	0.934843	0.0161394	-0.0828293	n.d.	n.d.	n.d.	n.d.	n.d.	n.d.		n.d.	n.d.		n.d.	n.d.				10950.8	417.758	46.5993	2.16926	44.937	2.57629	36.5234	1.56572	36.0337	1.34245	38.1085	1.68479	34.8031	1.57509	38.6135	1.7824	35.8892	1.53606	37.7967	1.70157	36.1255	1.60822	40.2723	1.67617
NIST612-3	62673	57499	31.535	0.977906		3.45238	0.0758807	0.91087	0.0209804	0.562783	n.d.	n.d.	n.d.	n.d.	n.d.	n.d.		n.d.	n.d.		n.d.	n.d.				10867.9	424.885	46.6	1.80995	43.7047	1.77823	38.5259	1.53903	35.9211	0.907018	38.2209	1.24804	35.1814	1.12749	37.4414	1.04051	35.1881	1.12814	36.911	1.2215	35.0051	0.832309	38.4334	1.15471
NIST612-4	62733	57505	32.6604	0.965978		3.34753	0.0780628	0.896817	0.0187525	-0.00742369	n.d.	n.d.	n.d.	n.d.	n.d.	n.d.		n.d.	n.d.		n.d.	n.d.				11065	366.154	46.599	2.50081	44.2092	2.52098	37.7245	1.63426	36.0215	1.26476	38.8212	1.42504	36.2779	1.63945	37.6528	1.18574	35.596	1.09181	37.2216	1.33019	35.2956	1.26443	39.5228	1.47051
NIST612-1	52255	68450	34.3885	1.00254		3.79464	0.104509	0.928089	0.0231489	0.504575	n.d.	n.d.	n.d.	n.d.	n.d.	n.d.		n.d.	n.d.		n.d.	n.d.				11379.5	407.942	46.5995	1.56536	44.0237	1.86768	38.2872	1.95542	35.794	1.19424	38.0682	1.24352	35.2722	1.49268	37.5269	1.452	35.8724	1.23117	37.6028	1.64189	35.8834	1.37512	39.3868	1.70473
NIST612-2	52305	68502	32.9861	1.02987		3.62528	0.0911124	0.926489	0.0158833	0.477286	n.d.	n.d.	n.d.	n.d.	n.d.	n.d.		n.d.	n.d.		n.d.	n.d.				11216.2	309.261	46.6012	2.44206	44.3215	2.21676	37.3784	1.49891	36.1805	1.30134	38.256	1.16223	35.1292	1.22305	37.5096	0.921564	34.9385	0.930429	37.3204	1.10457	35.0357	1.2539	38.8304	1.28194
NIST612-3	52370	68506	35.6573	1.03066		3.85391	0.10808	0.912809	0.0177084	0.301925	n.d.	n.d.	n.d.	n.d.	n.d.	n.d.		n.d.	n.d.		n.d.	n.d.				11276	386.451	46.5987	2.54402	42.8667	2.19313	37.1423	1.80476	35.9478	1.01518	38.3559	1.61684	35.6563	1.61726	37.5542	1.61992	35.5337	1.26652	37.2742	1.71845	35.4918	1.76064	39.5206	1.63857
NIST612-4	52434	68468	50.0301	1.07958		3.38085	0.0893867	0.912774	0.0168719	0.280191	n.d.	n.d.	n.d.	n.d.	n.d.	n.d.		n.d.	n.d.		n.d.	n.d.				11135.7	447.18	46.6009	2.02365	44.9344	1.81733	38.7528	1.59511	35.8101	1.47619	38.5095	1.88619	35.7035	1.19187	37.6848	1.80443	35.6958	1.20555	36.6598	1.55821	35.418	1.75336	38.941	1.34891
NIST612-1	52201	68453	34.5867	1.00449		3.58863	0.106156	0.913285	0.0202147	0.232049	n.d.	n.d.	n.d.	n.d.	n.d.	n.d.		n.d.	n.d.		n.d.	n.d.				11249.4	339.72	46.5993	1.75609	43.6857	2.18915	38.819	1.41901	37.4232	1.54233	40.102	1.56548	36.2262	1.27581	38.4738	1.62715	36.3526	1.50391	37.2313	1.72014	36.9928	1.62356	40.0863	1.53739
NIST612-2	52306	68454	33.6737	1.03086		3.67168	0.0980485	0.884495	0.018342	0.51663	n.d.	n.d.	n.d.	n.d.	n.d.	n.d.		n.d.	n.d.		n.d.	n.d.				11491.8	400.071	46.602	2.03319	43.0324	2.7735	37.6371	1.65011	35.6346	1.06305	38.0701	1.27535	34.985	1.12874	37.9409	1.37868	36.438	1.14165	37.9656	1.43441	35.9011	1.3042	39.3884	1.19315
NIST612-3	52374	68463	33.5356	1.00281		3.72015	0.105571	0.893203	0.019681	0.484194	n.d.	n.d.	n.d.	n.d.	n.d.	n.d.		n.d.	n.d.		n.d.	n.d.				11021.2	359.145	46.6	1.43106	44.4104	1.92962	37.4153	1.1438	35.932	0.702861	38.3137	1.34886	36.1536	1.04272	38.3819	1.37745	35.7059	1.21557	36.8261	1.35917	35.01	1.10529	38.88	1.12618
NIST612-4	52151	68459	50.7384	1.11475		3.48889	0.105247	0.944819	0.0262179	0.459945	n.d.	n.d.	n.d.	n.d.	n.d.	n.d.		n.d.	n.d.		n.d.	n.d.				11149.6	372.607	46.5975	2.57279	44.1326	2.97964	37.6359	1.58498	35.9787	1.04532	37.9785	1.43444	35.1789	1.17596	37.9163	1.34816	35.2357	0.986662	37.368	1.54558	35.926	1.14577	39.1819	1.21839
NIST612-1	52050	68503	33.9088	1.03032		3.77514	0.0595539	0.917272	0.0237451	0.447611	n.d.	n.d.	n.d.	n.d.	n.d.	n.d.		n.d.	n.d.		n.d.	n.d.				11279.4	506.945	46.5992	2.20929	43.7843	2.67207	38.3858	2.15141	35.9753	1.16052	38.228	1.5626	34.7767	1.36409	36.474	1.21015	35.9927	1.29974	38.1267	1.51955	34.9381	1.50076	38.5206	1.25959
NIST612-2	52111	68506	32.6255	1.03197		3.59844	0.105738	0.905395	0.0235645	0.355654	n.d.	n.d.	n.d.	n.d.	n.d.	n.d.		n.d.	n.d.		n.d.	n.d.				11102.9	359.134	46.5959	2.52502	44.0215	2.33981	38.1435	1.35289	36.1875	1.1989	38.813	1.55515	34.7999	1.3421	38.4428	1.5362	35.4228	1.23087	36.923	1.38834	36.3224	1.41953	40.4449	1.49454
NIST612-3	52179	68515	33.3746	1.02141		3.56887	0.0740316	0.923209	0.0184757	0.361193	n.d.	n.d.	n.d.	n.d.	n.d.	n.d.		n.d.	n.d.		n.d.	n.d.				11077.1	342.807	46.5945	2.1389	44.0204	3.0095	37.6606	1.79592	35.9311	1.07782	38.2562	1.40983	35.9849	0.987368	37.6562	1.65477	35.3116	1.10335	37.2164	1.10405	34.2928	1.42255	38.9206	1.25937
MKED-1	75208	41545	130.622	0.355592		3.81008	0.0989751	0.0959569	0.00203474	0.282777	1521	11.3	1502.5	17.6	1546.9	19.6		1546.9	19.6		-1.23128	-2.95507				6967.98	240.97	61.0539	2.85177	195515	4961.72	197.087	8.65496	462.163	21.3021	2065.29	86.5808	1555.37	59.6009	307.983	14.17	58.8142	2.58556	254.723	13.1178	203.457	8.1854	60.2066	2.72031
MKED-2	75152	41527	132.883	0.352202		3.70073	0.092739	0.0951207	0.00236931	0.501252	1536.71	9.82	1542.2	16.7	1529.2	23.8		1529.2	23.8		0.355985	0.842952				6405.86	186.383	51.6966	2.45136	192918	4291.03	204.523	7.59485	493.453	20.8231	2306.71	104.709	1692.16	58.0493	323.552	9.6767	63.172	2.54639	272.023	8.83467	213.744	8.26977	63.6408	2.54864
MKED-3	75259	41574	129.889	0.356821		3.78648	0.0653842	0.0967731	0.00195892	0.163389	1531.7	10	1509.5	12.4	1562.5	19.4		1562.5	19.4		-1.47069	-3.5111				6898.55	174.675	39.8722	1.01491	191148	4107.61	189.335	6.34697	440.316	14.8919	2001	88.6786	1504.58	58.334	302.099	12.5087	57.6408	2.30891	248.596	9.25864	202.085	7.61064	60.0372	2.17786
MKED-4	75131	41570	133.866	0.354151		3.79318	0.0936168	0.0958709	0.00215708	0.464712	1524.34	9.58	1509.5	16	1545	21.6		1545	21.6		-0.983107	-2.35177				6712.05	236.438	56.2349	1.82565	203820	5381.23	250.536	10.4298	610.236	20.4446	2777.74	114.48	2079.21	83.1877	396.521	13.9687	74.5906	2.92033	328.683	10.5059	259.603	8.87034	77.1886	3.5948
MKED-5	75191	41578	126.547	0.356945		3.76644	0.100268	0.0963207	0.00191998	0.636244	1531.81	8.13	1516.7	17.9	1552.8	18.5		1552.8	18.5		-0.996242	-2.38017				7047.06	304.188	47.6033	1.73627	201526	5080.76	214.365	9.97664	495.998	20.8076	2258.77	76.0366	1704.1	61.7837	333.007	11.9639	63.0193	2.73244	283.598	11.5468	224.675	8.49555	66.0898	2.81918
MKED-6	75244	41612	131.874	0.354504		3.77483	0.118387	0.0954863	0.00247828	0.520264	1525.2	11.4	1516.7	21.5	1537.1	24.6		1537.1	24.6		-0.560427	-1.34503				6960.55	235.604	47.6624	2.1309	195067	3861.66	194.665	5.8611	457.304	16.0598	2081.53	73.9574	1556.33	60.8747	299.509	12.1568	56.9008	1.88731	254.707	8.60429	196.53	6.36301	60.5158	1.79306
MKED-1	75239	41496	131.048	0.354998		3.77157	0.0852191	0.0959981	0.00208427	0.292716	1529.3	10.8	1516.7	16.1	1546.9	20.6		1546.9	20.6		-0.830751	-1.99117				6893.74	210.314	137.323	4.8888	189833	4506.81	191.15	8.49824	427.211	14.8173	2060.22	89.0176	1538.2	60.8405	312.251	13.2296	58.8127	2.22645	256.058	9.98356	197.28	7.29198	59.8463	2.27943
MKED-2	75180	41466	130.974	0.355013		3.77816	0.090613	0.0956877	0.00247466	0.435633	1524.8	10.5	1513.1	16.1	1541	24.6		1541	24.6		-0.773247	-1.8439				6452.18	295.639	127.386	4.30348	185826	4718.71	205.577	5.71642	462.453	17.3778	2178.77	94.9644	1626.61	53.2066	329.412	9.5582	63.1547	2.48764	279.946	12.2397	211.382	8.24385	63.8454	2.20086
MKED-3	75275	41459	130.995	0.355018		3.77194	0.0900211	0.0966837	0.00184869	0.760679	1535.08	6.14	1516.7	16.1	1560.6	17.5		1560.6	17.5		-1.21184	-2.89444				6779.36	225.024	119.405	4.15708	187532	4776.37	177.564	7.51118	405.824	13.3753	1903.31	58.4315	1478.75	40.8848	293.689	10.8571	56.0418	2.03781	243.119	9.01827	186.463	7.52564	55.3742	1.7324
MKED-4	75296	41528	131.015	0.355007		3.77344	0.0813383	0.0951985	0.00226383	0.317878	1522.7	10.5	1516.7	14.3	1531.2	22.7		1531.2	22.7		-0.395596	-0.956023				6741.47	227.25	128.396	5.48157	199528	4571.67	192.333	7.54895	428.722	16.1418	1983.94	63.4319	1489.85	41.7177	304.068	12.6147	57.523	2.60204	259.176	10.7608	198.819	8.7377	59.4269	2.33543
MKED-1	75379	41446	130.983	0.355009		3.77345	0.0902221	0.0959496	0.00236815	0.389391	1528.5	10.7	1516.7	16.1	1545	23.5		1545	23.5		-0.778005	-1.86589				6673.86	239.534	126.284	5.4788	194023	6166.94	185.397	8.80704	427.498	18.2452	1995.68	84.865	1512.06	57.5898	310.978	14.4028	58.7771	2.64951	257.132	14.2177	199.388	9.63702	60.2445	2.47521
MKED-2	75320	41416	130.998	0.355011		3.77395	0.0810447	0.0963867	0.00216858	0.628432	1532.63	7.51	1516.7	14.3	1554.7	21.4		1554.7	21.4		-1.05031	-2.50544				6949.49	286.361	129.049	5.74923	191643	4675.68	195.152	8.90824	426.837	12.595	1992.55	62.1476	1483.95	57.6547	307.597	11.1969	58.0999	1.85087	255.805	11.1967	194.097	7.54381	60.1235	2.23152
MKED-3	75375	41398	131.006	0.355022		3.74447	0.0804933	0.0960044	0.00216377	0.359837	1535.66	9.93	1527.5	14.5	1546.9	21.5		1546.9	21.5		-0.534206	-1.27005				6738.5	229.266	131.856	3.15538	187823	4107.95	189.943	6.00759	438.875	11.7199	2117.43	60.7201	1572.56	53.1339	320.978	11.3211	59.3889	2.09032	263.592	7.14049	205.901	7.09856	63.1928	2.01167
MKED-4	75436	41477	130.994	0.355014		3.78234	0.122087	0.095399	0.00264975	0.665094	1522.3	9.59	1513.1	21.4	1535.1	25.6		1535.1	25.6		-0.608023	-1.45397				6659.4	210.62	122.165	5.41934	178941	3531.54	180.608	4.54013	423.641	12.5798	2023.38	85.9855	1531.54	58.1828	315.412	13.5904	59.1087	2.50327	260.762	10.7579	200.598	7.83659	62.4703	2.64245
MKED-1	75452	41409	131.008	0.355012		3.77096	0.0677025	0.0965179	0.00156473	0.581967	1533.45	6.41	1516.7	12.5	1556.7	15.6		1556.7	15.6		-1.10437	-2.6373				6643.26	240.064	140.953	6.36327	204337	5191.48	185.778	5.98543	421.088	13.8795	2030.01	62.7318	1584.36	52.0524	317.749	12.7028	59.9316	2.01758	266.711	11.8747	204.026	8.21359	62.7432	2.14657
MKED-2	75424	41371	131.001	0.355012		3.77236	0.0910219	0.0948389	0.00212666	0.374742	1519.4	10.2	1516.7	16.1	1523.3	20.9		1523.3	20.9		-0.178018	-0.435155				6872.5	235.023	143.883	6.88863	206633	6273.47	197.907	7.77171	434.19	17.1683	2040.77	98.7824	1574.06	51.2377	318.12	8.76589	60.2523	2.68876	270.574	12.2015	203.836	8.70912	63.2355	2.73587
MKED-3	75528	41485	130.993	0.355011		3.77182	0.0830349	0.0965397	0.00221452	0.65711	1533.45	7.2	1516.7	14.3	1556.7	21.4		1556.7	21.4		-1.10437	-2.6373				6828.52	264.431	146.808	4.34523	204389	6255.66	189.716	7.39671	441.185	12.7967	2065.19	62.9631	1645.58	71.6174	324.221	14.5088	61.4273	2.18087	269.445	10.606	208.557	9.11574	64.6276	3.0184
MKED-4	75493	41448	130.994	0.355014		3.77769	0.0949874	0.0959788	0.00207051	0.260288	1527.2	11	1513.1	16.1	1546.9	20.6		1546.9	20.6		-0.931862	-2.23382				6762.96	249.922	128.786	4.36973	198452	5983.15	199.341	9.11054	444.423	10.2133	2047.95	60.5875	1648.47	69.2642	321.327	13.5261	60.138	2.08643	271.709	9.60518	211.485	7.02611	64.2232	2.57031
MKED-1	65336	52556	131.002	0.355005		3.76913	0.089001	0.0960024	0.0018484	0.305622	1529.3	10	1516.7	16.1	1546.9	17.6		1546.9	17.6		-0.830751	-1.99117				6940.58	307.942	155.411	7.69007	212564	6562.96	198.703	10.5665	471.157	17.4466	2147.99	88.0395	1653.83	71.4648	340.02	18.8163	64.0632	3.19078	286.258	14.9304	215.308	9.58762	67.2954	2.96656
MKED-2	65196	52390	131.004	0.355011		3.78372	0.0748819	0.0962226	0.00242935	0.402291	1528.89	9.64	1513.1	12.5	1550.8	23.4		1550.8	23.4		-1.04355	-2.49157				6957.61	302.487	160.279	9.0196	218517	7903.55	212.482	9.00293	458.793	20.9707	2072.36	80.2625	1614.36	54.5515	334.301	17.6926	62.2467	2.92776	282.013	13.3977	212.633	9.32229	66.5561	3.05722
MKED-3	65301	52503	130.956	0.355011		3.74516	0.0925474	0.0957671	0.00145377	0.326239	1531.9	9.47	1523.9	16.3	1543	14.7		1543	14.7		-0.524969	-1.25336				6854.32	256.526	149.259	5.95036	208871	5452.57	188.467	8.13285	437.4	15.5807	2039.71	76.7289	1570.14	63.4229	320.619	15.193	62.0828	2.78544	276.84	11.9033	210.796	11.1368	65.1248	2.97159
MKED-4	65265	52466	130.95	0.355009		3.80063	0.101601	0.0969999	0.00269961	0.263893	1531.3	13	1506	17.7	1566.4	26.1		1566.4	26.1		-1.67995	-4.01062				6426.06	309.229	130.745	7.16346	200784	6474.47	208.583	7.99951	520.894	25.2481	2356.23	87.9139	1778.67	69.2714	359.151	15.3078	66.4274	2.55246	257.898	11.1459	230.864	9.06276	65.7027	2.96671
MKED-1	65288	52394	131.024	0.355014		3.76963	0.10439	0.0948707	0.00266945	0.347821	1520.2	12.4	1516.7	17.9	1525.2	26.8		1525.2	26.8		-0.230764	-0.560427				6780.29	191.783	146.474	8.05971	198594	5206.6	191.755	7.91206	444.18	17.4052	2048.48	79.3011	1603.5	72.243	334.544	14.9172	62.1083	2.28302	275.518	11.132	215.252	8.54333	64.1159	2.30779
MKED-2	65256	52353	130.998	0.355008		3.74692	0.118681	0.0965222	0.00222325	-0.101083	1537.7	16.3	1523.9	21.7	1556.7	21.4		1556.7	21.4		-0.905571	-2.15237				6776.65	150.512	152.038	5.41267	194636	4719.81	205.355	8.10346	461.525	15.0158	2076.95	72.4625	1586.21	53.089	326.239	12.0003	61.4174	1.86746	271.281	7.30061	213.121	5.36126	62.6508	1.832
MKED-3	65361	52467	130.938	0.355009		3.75561	0.117342	0.0963192	0.00155562	0.362347	1533.9	12	1520.2	21.6	1552.8	15.6		1552.8	15.6		-0.901197	-2.14445				6555.91	200.185	159.274	6.38971	195308	5413.65	203.517	6.38841	467.944	12.9676	2084.07	56.3366	1605.18	45.2973	324.034	9.6021	63.1446	1.97629	275.104	10.3966	211.483	7.5953	66.2677	2.61191
MKED-4	65325	52430	130.914	0.354997		3.8145	0.122319	0.0951391	0.00252261	0.375921	1513.6	12.8	1502.5	21.1	1529.2	24.8		1529.2	24.8		-0.738769	-1.77704				6486.96	181.648	138.376	5.54733	199145	6193.57	229.71	8.31014	542.917	22.7741	2532.62	100.462	1911.42	95.2874	388.068	19.8667	70.8557	3.0996	268.15	11.5084	246.96	9.20755	73.5569	3.36669
MKED-1	65333	52339	131.051	0.355026		3.76012	0.0857949	0.0958036	0.00173753	0.544952	1529.79	8.19	1520.2	16.2	1543	16.7		1543	16.7		-0.630838	-1.4998				6634.14	203.672	154.902	5.54376	202090	4925.14	200.791	7.28078	467.81	16.4562	2152.78	81.231	1650.67	62.0011	340.714	12.0333	64.5003	2.40449	288.046	8.92024	215.874	5.91123	68.3348	1.50341
MKED-2	65301	52298	130.981	0.355006		3.84938	0.190084	0.0964424	0.00153484	-0.0575993	1516.1	20.7	1488.5	32.8	1554.7	14.6		1554.7	14.6		-1.85422	-4.44743				6914.64	221.631	159.306	6.53782	205853	5439.22	199.691	7.11245	457.689	14.9504	2128.63	72.6075	1642.34	52.5266	348.367	12.3897	64.2475	2.71443	281.218	11.812	217.888	9.00115	66.4214	2.44604
MKED-3	65368	52388	131.001	0.355016		3.76865	0.086374	0.0957689	0.00157648	0.55424	1527.69	8	1516.7	16.1	1543	15.7		1543	15.7		-0.724599	-1.73403				6609.98	154.366	143.462	5.69473	211682	5146.47	206.194	10.2651	465.735	17.1613	2154.08	69.8492	1671.71	56.5332	351.527	12.9264	66.331	2.04561	300.903	11.9924	229.065	10.2578	69.3988	2.53945
BLR-1	76237	44068	308.785	1.63535		5.80337	0.154556	0.0888694	0.00205221	0.719102	1152.87	6.42	1025.4	12.3	1401.1	22.6		1007.1	12.1		-12.4312	-36.6394				17354.4	571.76	21.9177	0.735719	174555	4394.5	1155.77	41.0806	320.647	9.69704	1560.32	59.4634	1407.58	35.6247	441.752	11.8021	74.5957	1.86233	327.957	11.6983	661.629	24.446	308.785	12.6138
BLR-2	76860	44063	242.155	1.81389		5.70648	0.15189	0.0895859	0.0021021	0.5313	1169.11	8.41	1040.3	12.6	1416.2	22.4		1021.6	12.4		-12.382	-36.1338				15291.8	445.853	16.9898	0.626035	175499	4509.91	1112.39	59.6267	260.075	8.87452	1333.56	38.6988	1171.82	38.4824	380.357	13.8483	64.5886	1.98325	279.358	10.3738	570.587	22.1819	263.525	10.4669
BLR-3	77436	44160	187.046	1.6396		5.45604	0.170744	0.0914478	0.00199086	0.588571	1214.46	8.99	1084.2	15.5	1454.1	20.8		1064.5	15.3		-12.0144	-34.1173				15589.5	585.972	15.698	0.544561	177228	4457.58	1065.06	51.449	287.642	13.0137	1329.61	51.8744	1156.26	45.9338	355.07	16.7812	59.4841	2.3908	272.165	10.3704	529.091	20.7842	250.58	11.3776
BLR-4	77893	44049	270.03	1.47332		5.68397	0.12992	0.0860754	0.00216	0.458344	1145.23	8.68	1045.4	11	1339.6	24.7		1031	10.9		-9.54945	-28.1423				17471.5	703.145	24.3749	1.28376	174997	5270.38	959.043	32.4304	341.461	10.8764	1652.4	77.1373	1375.92	68.8254	393.47	13.8039	64.9303	2.2503	301.811	13.4234	540.105	23.6953	261.469	10.1889
BLR-5	78508	44020	288.305	1.92489		5.56029	0.164115	0.0922527	0.00193872	0.538782	1208.55	8.74	1066.2	14.1	1472.7	19.5		1044.9	13.9		-13.3512	-38.1261				15548.8	582.726	31.8744	1.98709	185747	5799.33	1093.21	48.8355	259.299	7.94544	1343.52	38.328	1183.63	43.3653	377.634	13.3352	64.2373	2.24606	282.826	10.0753	578.45	21.7838	271.601	11.417
BLR-6	78880	43987	319.689	1.87803		5.69089	0.119768	0.0911987	0.00178022	0.534833	1183.88	6.93	1043.7	10.2	1449.9	18.8		1023.14	9.98		-13.4311	-38.9192				15781.4	543.756	39.7797	1.79767	182298	4618.96	1057.83	42.4631	253.461	7.76915	1293.09	49.9948	1144.3	49.749	364.91	11.8305	62.6468	2.18642	271.951	8.04441	561.491	17.3871	260.521	6.59948
BLR-1	76276	44104	304.534	1.6705		5.64209	0.135704	0.0880225	0.00188245	0.255499	1165.17	9.82	1052.2	12	1381.6	20.7		1035.8	11.9		-10.7366	-31.3058				16067.3	546.558	83.0445	4.20759	172834	4234.26	1160.13	56.4175	291.018	13.2334	1494.48	59.8524	1323.91	70.3165	425.937	20.1657	72.7724	2.7968	344.633	16.4016	664.845	29.9159	318.804	15.3757
BLR-2	76893	44010	279.762	1.81341		5.62837	0.147813	0.0891956	0.00245431	0.318796	1175.8	11.1	1054	13	1407.6	26.8		1036.1	12.8		-11.556	-33.5484				15970.1	596.435	70.4208	2.62951	165193	5204.52	1117.91	60.0601	260.902	13.1846	1329.5	59.5609	1208.82	58.6803	393.746	19.8257	67.259	2.68677	328.767	13.6447	617.721	24.3479	285.116	10.9806
BLR-3	77403	44123	240.94	1.57235		5.46193	0.0812011	0.0909841	0.00243049	0.0535733	1211.4	10.4	1084.16	7.31	1445.7	25.1		1064.99	7.19		-11.7363	-33.3475				15898.9	690.502	64.0939	3.14296	169424	5473.28	1120.89	61.2414	294.248	14.596	1378.7	52.5841	1204.85	48.507	377.59	20.595	60.3627	2.27556	309.311	13.7421	531.175	26.0188	255.963	12.7086
BLR-4	77923	44013	248.047	1.42856		5.5275	0.137931	0.0888035	0.00223834	0.280179	1185.2	10.5	1071.5	12.5	1399	23.7		1054.7	12.3		-10.6113	-30.5646				17244.3	722.234	65.2466	3.24996	179729	6694.3	1056.99	60.3852	345.347	13.9452	1680.58	69.2177	1409.9	55.8779	413.228	18.9206	68.0782	3.11511	356.129	18.5636	588.174	26.672	283.053	12.9885
BLR-1	76327	44076	324.794	1.65076		5.72035	0.147276	0.088825	0.00146681	0.436229	1161.68	8.36	1038.6	12.6	1399	16.2		1020.8	12.4		-11.8506	-34.7006				16863.2	481.719	81.6944	3.80246	170286	3672.35	1137	40.7576	293.448	14.1018	1466.25	48.4987	1305.91	41.7433	437.356	13.5299	71.0661	2.36502	367.343	13.4774	682.962	25.1404	329.459	13.3215
BLR-2	76946	43996	326.751	1.65045		5.33841	0.120465	0.0863654	0.0013926	-0.0298916	1190.48	9.85	1106.5	11.4	1346.3	15.6		1093.9	11.3		-7.5897	-21.6719				16603.1	556.864	84.1646	3.91082	173484	4106.24	1113.4	38.604	301.777	12.5004	1509.52	59.997	1328.86	56.6338	441.331	20.1873	72.4272	3.07089	370.373	16.7628	683.846	30.1343	326.177	15.2955
BLR-3	77353	44093	228.528	1.60554		5.51161	0.134829	0.096611	0.00369111	-0.0111726	1247.4	16.2	1075.1	11.7	1558.6	35.9		1048.7	11.4		-16.0264	-44.9726				15561.3	611.03	71.2381	2.80955	165351	5373.24	1174.94	58.027	291.982	14.1423	1401.59	57.6102	1235.26	40.9764	378.097	14.8813	60.945	2.58468	311.056	14.3688	544.986	23.0657	258.039	11.3683
BLR-4	77973	44007	295.211	1.5693		5.57532	0.161589	0.0854737	0.00210806	0.581126	1152.64	8.5	1062.7	14	1326	23.8		1049.6	13.9		-8.46335	-24.7765				16819.1	668.662	67.4405	2.49637	164584	6118.7	1116.29	64.2692	320.105	14.7	1565.3	43.8311	1383.09	44.7514	445.272	19.3928	70.1071	3.33908	367.876	16.1186	636.57	34.9464	299.072	13.9641
BLR-1	76361	44108	319.305	1.65547		5.32535	0.143884	0.0856547	0.00175086	0.692429	1186.09	6.73	1108.5	13.4	1330.6	20.3		1096.8	13.2		-6.99955	-20.0361				16481.4	506.034	83.7818	3.13308	180275	4721.11	1113.76	45.6187	295.349	11.4707	1476.02	54.2407	1327.05	47.0744	439.655	18.7635	71.5235	2.69901	370.081	12.5862	674.104	28.6136	315.763	13.2439
BLR-2	76982	44035	264.648	1.85306		5.61273	0.136786	0.0901692	0.00208286	0.381903	1186.08	9.41	1057.4	12.2	1428.9	22.2		1038.5	12		-12.1695	-35.1333				15800.4	508.992	82.3438	3.0399	185985	5188.35	1235.24	47.3172	271.11	10.4094	1388.66	49.5826	1251.83	47.9439	404.257	14.8671	69.3439	3.39089	349.412	15.3137	624.356	27.2895	291.479	11.261
BLR-3	77330	44060	229.932	1.56417		5.4183	0.11753	0.0900831	0.00197392	0.256535	1209.53	9.53	1091.5	11.1	1426.8	21.2		1073.7	10.9		-10.8136	-30.7192				15687.6	487.671	77.9458	3.36346	179736	4722.19	1119.56	44.802	292.628	10.9173	1419.03	46.2285	1250.6	40.4206	388.067	12.4898	60.5528	1.84598	335.686	9.35361	589.995	19.3835	274.843	9.70477
BLR-4	77961	44050	233.116	1.40119		5.45848	0.140629	0.086501	0.00259031	0.52143	1175.76	9.6	1084.2	12.8	1348.5	29		1070.6	12.6		-8.44494	-24.3774				17830.6	672.602	67.119	2.88105	177354	5549.13	1107.95	45.671	351.434	11.6074	1749.79	76.7287	1474.82	55.4213	437.295	10.3315	68.0941	2.18903	360.089	9.85544	599.534	21.4244	294.301	13.3608
BLR-1	66076	55199	280.624	1.59819		5.33736	0.155497	0.0877151	0.00138577	0.0688466	1201	11.6	1106.5	15.2	1375.1	15.3		1092.3	15.1		-8.54044	-24.2747				17214.6	712.154	96.1311	4.70321	191149	5733.5	1290.99	51.9106	313.6	12.1166	1456.25	40.9333	1382.78	43.2585	472.299	21.1632	74.4596	2.76578	412.025	17.1717	742.303	38.0849	343.162	16.0844
BLR-2	66711	55116	270.561	1.81475		5.59398	0.151728	0.0901666	0.00147406	0.130323	1188.6	10.4	1060.9	13.1	1428.9	15.9		1042	12.9		-12.0369	-34.6875				15875.2	460.801	77.9088	3.60377	190135	5175.63	1091.77	42.8008	265.27	12.6993	1304.16	64.928	1178.14	54.9626	395.191	17.2959	66.7372	2.44888	353.51	20.255	619.875	29.903	289.63	13.8896
BLR-3	67149	55113	238.571	1.71284		5.72522	0.156956	0.0906697	0.00198044	-0.103892	1175.2	13	1037	13.4	1439.5	21		1016.8	13.1		-13.3269	-38.8139				16183.2	556.393	77.7698	3.73835	185334	5186.89	1180.1	51.9201	285.928	10.157	1394.51	36.1649	1168.34	39.23	370.875	13.091	60.5165	1.96113	334.952	12.507	575.646	25.0446	263.207	11.7972
BLR-4	67627	55136	273.446	1.45519		5.49167	0.128054	0.0870763	0.00189353	0.348939	1176.75	9.05	1078.7	11.8	1361.8	21		1064.2	11.6		-9.08964	-26.2446				17877.8	780.677	59.066	2.92359	182666	5575.04	1154.28	62.2744	394.283	18.3197	1859.17	82.2183	1564.57	74.8381	463.4	25.6857	71.9308	2.87122	385.296	18.0503	689.017	34.5926	306.63	13.248
BLR-1	66035	55226	298.05	1.62483		5.38134	0.12871	0.0869814	0.00180528	0.65089	1190.1	6.67	1099	12.2	1359.6	19.9		1085.3	12.1		-8.28935	-23.7125				16588.7	589.392	85.967	3.97702	177779	4690.82	1173.44	41.9104	297.676	12.4111	1494.54	63.1279	1309.58	55.418	432.15	16.7852	72.4548	3.22217	398.137	17.1358	707.007	29.1951	317.039	13.5512
BLR-2	66629	55083	259.873	1.86624		5.62643	0.121848	0.0870088	0.0017478	0.471893	1158.49	7.28	1054	10.4	1359.6	18.8		1038.8	10.2		-9.91366	-28.9943				16072.6	894.165	84.2984	5.16394	183997	5601.39	1198	45.6396	264.556	12.1876	1306.46	58.5401	1181.94	54.7813	400.875	14.8753	67.1339	3.38629	362.909	15.2247	650.237	27.5338	286.732	12.455
BLR-3	67180	55075	233.838	1.70153		5.64372	0.136453	0.0891289	0.00208134	0.620853	1173.79	7.35	1052.2	12	1405.4	22.6		1034.5	11.9		-11.5558	-33.5678				15720.2	583.783	81.7433	3.45171	172789	4623.16	1225.4	58.5964	292.004	9.67249	1388.33	47.7	1198.4	40.6578	385.158	14.7838	62.9772	2.21744	338.199	16.1713	581.973	28.6889	268.859	11.3929
BLR-4	67714	55100	293.289	1.70651		5.58058	0.185399	0.0874301	0.0025971	0.568501	1167.8	10.3	1062.7	16.7	1368.5	28.6		1047.3	16.5		-9.8899	-28.7758				17323.6	775.197	57.9509	3.17235	176142	5494.2	1227.29	61.3828	365.336	18.7469	1752.58	79.0922	1507.31	58.0661	494.797	24.8489	77.2791	3.99569	407.036	19.8088	741.393	30.9222	342.894	16.3754
BLR-1	65901	55143	290.724	1.66123		5.69273	0.175023	0.087492	0.00218324	0.5913	1155.12	9.09	1043.7	15.2	1370.7	24.2		1027.6	15		-10.6755	-31.3308				16542.3	616.443	92.5241	3.91476	176132	3848.35	1249	50.2934	311.847	15.5406	1533.43	71.3198	1387.84	57.6688	464.342	22.9481	74.5685	3.15149	399.389	14.2429	720.468	32.9066	338.096	15.0997
BLR-2	66710	55159	256.621	1.88599		5.38338	0.129156	0.0896264	0.00268815	-0.0537032	1210.8	14	1099	12.2	1416.2	28.8		1082.1	12		-10.1729	-28.8626				16086	550.202	84.3302	4.47747	189390	6432.26	1170.53	64.3907	271.668	11.9114	1371.2	53.5994	1234.89	59.8439	422.502	19.0587	70.96	3.24371	370.116	16.9473	628.362	29.7693	292.711	12.4755
BLR-3	67205	55043	163.429	1.63158		6.16104	0.149713	0.0903466	0.00166245	0.183522	1122.36	9.5	969.8	11	1431	18		948.6	10.7		-15.7311	-47.5562				16177.9	749.714	66.1765	3.06315	197806	6612.1	1342.67	73.028	347.106	14.9898	1654.14	61.0563	1383.97	55.9414	438.028	17.3029	68.9666	2.02484	358.893	16.0328	669.083	28.2144	293.739	10.972
FCt-1	77329	37913	49.4421	0.179993		92.9186	3.44952	0.513397	0.0159157	-0.22021	574.9	11.7	69.01	1.27	4279.5	22.8		40.4	0.75		-733.068	-6101.28				6802.47	240.093	157.532	59.131	203579	5057.58	570.834	17.6123	3279.11	105.429	10404.7	467.471	6494.3	245.044	975.935	35.3202	164	5.76162	993.235	33.217	584.969	19.6879	279.729	11.7423
FCt-2	77403	38174	20.1404	0.154816		52.1523	4.02995	0.651923	0.0284331	-0.586027	1017.1	35	122.44	4.69	4627.5	31.5		56.72	2.18		-730.693	-3679.4				7427.57	291.48	1715.59	693.278	188574	9720.38	732.377	26.4324	3482	140.813	13463.2	684.485	10654	487.672	2202	110.37	263.902	14.205	1726.06	74.8618	1218.3	69.7266	349.203	16.8275
FCt-3	77999	38295	44.4751	0.251717		117.702	3.77866	0.437819	0.0136948	0.338325	420.22	6.27	54.54	0.87	4043.6	23.3		27.62	0.44		-670.48	-7314.01				7162.46	186.334	56.2972	1.53138	202201	4762.76	542.248	17.9175	2561.57	78.5541	8425.28	246.577	5289.06	122.921	847.23	21.4114	153.18	3.97189	815.733	31.3237	563.157	13.643	299.334	7.83704
FCt-4	78168	38339	84.4382	0.218876		122.067	3.17565	0.446616	0.0123598	0.283491	414.55	5.5	52.59	0.68	4073.3	20.7		26.04	0.34		-688.268	-7645.39				6919.29	215.416	159.905	6.28043	203288	6757.65	537.607	17.077	2622.87	89.4263	8870.92	405.054	5542.93	160.659	868.993	33.4422	157.561	5.19348	753.813	23.4953	544.218	16.7632	284.222	8.81613
FCt-5	78378	38781	91.3759	0.212322		104.877	3.91095	0.478482	0.0178499	0.50973	495.33	7.23	61.17	1.13	4175.6	27.5		27.84	0.52		-709.76	-6726.22				7969.25	325.888	177.829	10.7112	204560	4176.09	563.931	23.6755	2917.26	117.449	9937.3	343.006	6203.04	210.951	964.01	44.2075	155.054	7.29988	933.42	48.9439	598.642	37.9959	321.133	16.8341
FCt-6	78651	38713	95.3998	0.202374		107.711	3.35946	0.479972	0.0210664	-0.30185	486.2	11.8	59.57	0.92	4180.3	32.5		36.64	0.57		-716.183	-6917.46				6957.66	237.868	237.931	19.9567	205482	6716.82	556.553	19.745	3257.55	193.446	10468.8	582.283	6397.75	338.393	905.18	47.0693	149.501	6.11539	883.807	48.2753	544.365	25.1492	269.899	11.9482
FCt-1	77891	37802	59.8504	0.191847		94.9355	4.71606	0.485969	0.0210777	-0.0346391	542.1	14.1	67.54	1.67	4198.6	32.1		41.19	1.02		-702.635	-6116.46				6144.76	362.261	7190.56	2958.73	173041	8186.03	511.15	32.7497	2585.23	160.225	8618.6	452.946	5557.05	307.855	870.966	50.1596	152.044	7.98943	843.28	51.7424	518.54	30.8414	246.878	16.4277
FCt-2	77383	38208	32.0574	0.176025		67.4416	1.49182	0.595483	0.0233992	0.745352	808.38	7.53	94.89	1.04	4496.4	28.6		29.19	0.32		-751.913	-4638.54				8250.95	325.724	254.828	16.4469	193950	7141.86	796.908	38.3732	3071.86	151.223	12648.3	482.293	10238.3	419.056	2364.17	124.402	285.239	13.1387	1839.75	102.476	1421.95	75.9308	437.951	21.9721
FCt-3	78080	38293	66.9589	0.207694		105.231	4.09535	0.461634	0.020754	0.674128	480.12	6.62	60.97	1.18	4122.4	33.4		29.05	0.56		-687.469	-6661.36				7138.42	293.65	238.608	7.95987	201360	6296.54	609.227	37.949	2691.58	94.7959	8980.21	290.219	5689.42	179.784	868.757	31.5449	170.852	9.20662	781.552	22.9094	554.838	17.0816	310.051	11.5638
FCt-4	78193	38381	63.3535	0.210388		114.255	3.05104	0.459228	0.011266	0.104296	447.53	6.23	56.17	0.75	4114.6	18.3		26.93	0.36		-696.742	-7225.26				6672.94	154.399	233.811	7.70056	202841	4321.44	516.111	22.9811	2623.69	101.242	8692.69	320.432	5652.15	208.095	893.434	35.532	161.821	5.87051	820.308	41.2501	556.315	23.5783	282.95	10.6495
FCt-1	77977	37721	64.429	0.194417		110.966	3.94245	0.460363	0.0213881	-0.103156	459.2	11.3	57.83	1.02	4118.5	34.5		36.57	0.65		-694.052	-7021.74				6508.5	319.064	278.324	12.9753	199036	6192.8	552.859	39.0326	2898.2	200.696	9289.63	560.891	5983.38	301.588	914.901	49.3435	171.107	9.04192	860.406	54.6022	541.169	33.5571	263.073	20.0846
FCt-2	77374	38247	52.5718	0.212788		86.3077	2.19128	0.545394	0.0200809	0.02968	636	10.4	74.26	0.94	4368.2	27		27.52	0.35		-756.45	-5782.31				8103.91	286.152	195.24	6.07613	196233	6374.64	620.352	24.5845	2928.35	101.121	11778.5	437.367	8605.78	271.46	1662.88	62.1678	139.735	5.95443	1383.12	54.0955	1187.79	49.3337	554.198	24.0807
FCt-3	77916	38163	62.1743	0.208687		114.87	3.4841	0.459844	0.0193945	0.458542	446.08	7.04	55.88	0.84	4116.6	31.3		26.74	0.4		-698.282	-7266.86				7275.53	270.797	266.716	10.3413	192715	5840.66	572.517	23.9739	2567.51	104.11	8489.4	276.816	5527.62	209.183	873.859	35.2134	156.318	6.281	785.372	30.8413	552.284	24.9599	294.608	11.583
FCt-4	78165	38444	63.3546	0.205206		118.36	2.76273	0.45268	0.0190678	0.396578	429.9	6.87	54.24	0.63	4093.4	31.4		26.44	0.31		-692.588	-7446.83				6641.1	203.96	253.573	8.53321	188143	5352.4	526.7	17.7404	2668.68	81.096	8959.24	370.027	5810.72	254.224	914.158	35.5418	164.605	5.37856	779.669	28.349	567.001	20.7005	297.908	12.8298
FCt-1	78014	37746	65.3503	0.213066		111.703	4.0011	0.429611	0.0117282	0.475322	431.84	5.8	57.46	1.02	4015.4	20.3		29.7	0.53		-651.549	-6888.17				7254.23	305.109	291.675	11.7305	206149	5525.25	569.266	18.8061	2453.81	78.8129	8163.94	299.978	5427.09	147.655	874.262	28.8997	159.308	5.75637	781.132	27.224	572.634	24.8681	284.927	11.4212
FCt-2	77418	38255	46.4661	0.199197		88.116	2.22269	0.544007	0.0229359	0.345289	625.09	9.52	72.74	0.91	4364.4	30.8		27.09	0.34		-759.348	-5900				8141.04	320.845	213.642	6.07525	208141	6323.11	600.658	29.6305	2946.45	110.599	11708.5	514.613	8623.56	386.474	1580.36	85.4202	148.898	5.88492	1289.18	48.5536	1090.31	47.977	525.343	22.1967
FCt-3	77939	38128	59.2538	0.197939		112.675	3.18555	0.455964	0.0235631	0.273726	450.08	9.43	56.96	0.8	4104.2	38.4		27.54	0.39		-690.169	-7105.41				6974.06	208.29	307.956	14.3471	209120	6199.24	577.748	23.8216	2766.97	92.386	9136.69	431.811	6083.5	292.034	959.565	32.5399	167.2	6.19359	842.178	29.4286	612.072	20.3025	309.989	15.2054
FCt-4	78208	38449	60.6825	0.193369		113.757	5.25668	0.472654	0.0188022	0.126503	459.7	10.5	56.42	1.3	4157.6	29.5		26.08	0.6		-714.782	-7269.02				6496.77	225.646	253.32	11.6137	203198	5187.08	534.365	19.4425	2759.97	116.345	9183.5	472.466	6087.91	272.933	967.533	39.23	172.026	5.71963	845.483	36.9743	613.267	25.2041	313.151	12.9977
FCt-1	67600	48888	63.7835	0.192023		102.447	3.17139	0.466822	0.016768	0.398978	494.82	7.23	62.62	0.96	4139	26.7		29.43	0.45		-690.195	-6509.71				7013.93	301.033	1328.71	865.984	213192	6626.75	589.331	24.1493	2878.21	73.7281	9360.77	398.602	6078.14	179.072	979.485	27.7862	179.394	6.314	928.362	29.9584	610.813	21.3177	309.527	14.5728
FCt-2	67163	49298	55.3294	0.202199		90.5672	2.58253	0.522258	0.0209502	0.21729	593.87	9.86	70.79	1	4304.8	29.5		28.3	0.4		-738.918	-5981.08				7833.96	289.3	227.328	11.1184	212387	5352.11	641.621	28.5337	3154.98	112.335	11551.1	353.526	8088.78	363.048	1343.18	56.42	161.007	7.39653	1211.08	49.5243	890.932	34.2732	474.002	20.4022
FCt-3	67668	49209	71.9463	0.212618		114.248	3.63446	0.462433	0.0190728	0.410435	450.08	7.36	56.18	0.89	4124.9	30.6		26.7	0.42		-701.139	-7242.29				7415.51	233.964	314.645	11.6975	207893	6430.99	595.641	12.6487	2647.1	90.8661	8610.78	345.637	5489.04	239.512	886.106	27.3548	161.206	5.44699	806.057	22.4282	549.426	17.6077	275.974	11.0272
FCt-4	67907	49538	96.0893	0.210679		100.15	3.77412	0.455363	0.0232634	0.533734	494.03	8.73	64.05	1.2	4102.3	38		31.03	0.58		-671.319	-6304.84				6777.14	204.019	268.603	10.7604	196476	4914.07	532.213	19.8715	2753.08	95.4538	8982.46	340.802	5978	229.653	966.628	34.3109	175.825	6.12122	919.642	44.2528	626.148	27.9032	306.27	12.5314
FCt-1	67639	48858	66.5696	0.211857		112.499	3.52039	0.453657	0.0148528	0.943603	448.79	2.03	57.05	0.89	4096.7	24.4		27.75	0.43		-686.661	-7080.89				7350.7	302.531	343.662	46.7759	200747	4127.46	560.76	25.2897	2537.85	108.353	8096.84	412.25	5273.8	203.613	856.722	35.8176	159.976	5.92354	797.732	28.9832	552.97	22.8962	289.732	10.312
FCt-2	67173	49260	35.2717	0.183169		73.7213	2.51525	0.571604	0.0217554	0.582716	738.05	8.74	86.86	1.47	4436.8	27.8		29.34	0.5		-749.701	-5007.99				8615.85	369.743	295.674	11.7244	208813	6121.16	815.431	37.1734	3104.8	130.252	12169.9	551.869	9936.41	371.866	2117.19	89.9196	253.857	10.3212	1733.52	70.9205	1335.62	69.3036	457.283	21.6138
FCt-3	67718	49211	69.9606	0.207296		103.957	4.4008	0.487912	0.012761	0.120507	506.51	9.38	61.71	1.3	4204.4	19.4		27.35	0.58		-720.791	-6713.16				7108.61	254.147	1321.31	670.565	197333	5830.84	581.165	20.7927	2736.17	95.7257	8710.58	334.379	5727.55	240.159	890.378	27.7629	161.459	6.86293	823.369	36.7139	565.036	24.795	285.315	15.5685
FCt-4	67946	49561	106.832	0.226591		103.569	3.32734	0.464921	0.0194789	0.408292	488.99	7.97	61.94	0.99	4132.9	31.1		29.26	0.47		-689.458	-6572.42				7106.09	300.909	268.145	11.9457	195911	5986.73	584.203	25.0313	2810.33	97.8585	9072.58	305.099	5937.89	178.491	973.322	37.903	173.409	5.03656	887.192	37.2129	619.412	22.3108	325.28	9.23203
FCt-1	67620	48823	61.9012	0.196725		110.465	3.67645	0.438444	0.0167873	0.487672	442.98	6.54	58.09	0.96	4045.6	28.6		29.38	0.49		-662.575	-6864.37				7197.87	257.271	815.265	256.924	204348	5662.96	563.676	26.9658	2859.54	135.819	9170.11	384.153	6008.8	249.244	934.837	36.3226	170.32	5.41468	877.581	34.1381	586.269	24.6253	294.979	15.8659
FCt-2	67120	49180	33.1299	0.193213		66.6203	2.50547	0.600032	0.0180599	0.239393	819.4	11.9	96.04	1.8	4507.3	21.9		29	0.55		-753.186	-4593.15				8245.76	429.4	2119.71	1564.43	208588	8464.72	851.852	49.557	3020.55	123.109	12200	463.659	10043.6	396.136	2265.54	113.858	288.152	11.4387	1817.75	88.2347	1338.12	66.3646	468.784	23.2526
FCt-3	67749	49181	67.5296	0.202715		110.151	4.1669	0.445873	0.0206947	0.190051	450.16	9.83	58.26	1.1	4070.9	34.6		28.91	0.55		-672.674	-6887.47				7119.71	312.521	267.811	18.3875	214596	8829.04	571.686	28.4125	2812.2	121.357	8944.67	328.597	5813.61	247.162	920.393	46.2028	169.902	7.02561	840.291	46.887	564.244	30.6629	276.294	14.5354
[truncated: 4 more columns]

## Sheet: DRS Settings
Data Reduction Scheme Settings
U-Pb Geochronology
238U/235U	137.818
BeamSecondsMaximum	30
BeamSecondsMethod	Laser log
BeamSecondsSensitivity	1000
DefaultFitType	Exponential with linear
FitEndCrop	1
FitStartCrop	1
IndexChannel	U238
MaskChannel	U238
MaskMethod	Laser log
MaskResults	TRUE
MaskThreshold	1000
MaskTrim	2
Pb206_U238
Pb207_U235
Pb208_Th232
ReferenceMaterial	T_MKED1
UIsotopeCutoff	2000000
UIsotopeMode	U238
l232	4.9475e-11
l235	9.8485e-10
l238	1.55125e-10
